# Supplementary material for: Identification of the male-specific region on the guppy Y Chromosome from a haplotype-resolved assembly
Source: Genome Res. 2025 Mar;35(3):489–98. doi: 10.1101/gr.279582.124 (PMC11960691; doi:10.1101/gr.279582.124)
Supplement: Supplement 1 [file Supplemental_Table_S1.xlsx]

## Sheet: Final_2
Supplemental Table S1: Rearrangement of XY Chromosome 12 (LR880656.1)
New	Length (b)	Comments
II rc	692333
I rc	2566538
III	1569877
VI	433863
V	2666012
scaf_013F_0.2	402565	4)
VII	2549085
VIII	4418118
IX	4308470
X cropped*	273710	1)
XI rc	4043478
XIV	963875
scaf_200F_0	252386	4)
IV	473067	2)
scaf_250F_0	115000	4)
XII	238801	3)
XIII rc	1120001
scaf_181F_0	320000	4)
scaf_149F_0	740000	4)
Total	28147179
1) * Origial contig X was cropped by 1 to 160.000 that was shifted to chr. 4.
2) Contig IV was left out because no contacts were detected
3) Sequences of contigs XII and IV are partially redundant
4) Putative l unplaced contigs of the male XY assembly LR880656
(see Whiting et al. 2022, Table S3)
