# Supplementary material for: Identification of the male-specific region on the guppy Y Chromosome from a haplotype-resolved assembly
Source: Genome Res. 2025 Mar;35(3):489–98. doi: 10.1101/gr.279582.124 (PMC11960691; doi:10.1101/gr.279582.124)
Supplement: Supplement 2 [file Supplemental_Table_S2.xlsx]

## Sheet: Sheet1
Supplemental Table S2: Primary construction of Y-haplotypes from long contigs
Nr	GUA haplotype	sense	GUA_tig length (bp)	Nr of genetic markers	Nr	MAC haplotype	sense	MAC_tig length (bp)	Nr of genetic markers
1	Gua_tig00000738	fw	765992	1	1	Mac_tig00000304	fw	702422	1
2	Gua_tig00001218	fw	10700156	11	2	Mac_tig00000950	rev	7916290	8
					3	Mac_tig00000082	fw	2756844	5
3	Gua_tig00001219	fw	1234644	1	4	Mac_tig00000993	rev	649475	0
4	Gua_tig00001220	fw	897456	0	5	Mac_tig00000951	rev	903965	0
5	Gua_tig00000294	rev	9638814	9	6	Mac_tig00000028	rev	9869282	9
6	Gua_tig00000770	rev	640028	0	7	Mac_tig00000315	rev	659580	0
7	Gua_tig00001198	rev	467795	0
8	Gua_tig00001197	rev	1279940	0	8	Mac_tig00000982	fw	1916245	1
9	Gua_tig00000808	fw	426093	1
10	Gua_tig00001310	rev	1549587	0
11	Gua_tig00001309	rev	740052	0	9	Mac_tig00000193	rev	2257752	0
		SUM	28340557	23				27631855	24
