# Supplementary material for: Identification of the male-specific region on the guppy Y Chromosome from a haplotype-resolved assembly
Source: Genome Res. 2025 Mar;35(3):489–98. doi: 10.1101/gr.279582.124 (PMC11960691; doi:10.1101/gr.279582.124)
Supplement: Supplement 3 [file Supplemental_Table_S3.xlsx]

## Sheet: Sheet1
Supplemental Table S3: Repeat content in pseudoautosomal region (PAR) and MSY of Ygua and Ymac
	Ygua PAR			Ygua MSY			Ymac PAR			Ymac MSY
Item	number of elements	length occupied	percentage of sequence	number of elements	length occupied	percentage of sequence	number of elements	length occupied	percentage of sequence	number of elements	length occupied	percentage of sequence
Retroelements	5923	1548953 bp	0.0659	1973	782624 bp	0.1584	5943	1510151 bp	0.0643	1856	808124 bp	0.1656
SINEs:	655	69913 bp	0.003	139	13330 bp	0.0027	653	69099 bp	0.0029	114	13417 bp	0.0027
Penelope:	0	:	0	0	0 bp	0	0	0 bp	0	0	0 bp	0
LINEs:	3718	977175 bp	0.0416	1246	517918 bp	0.1048	3730	975456 bp	0.0415	1205	534909 bp	0.1096
CRE/SLACS	0	0 bp	0	0	0 bp	0	0	0 bp	0	0	0 bp	0
L2/CR1/Rex	2428	488909 bp	0.0208	737	283953 bp	0.0575	2421	501728 bp	0.0214	683	299316 bp	0.0613
R1/LOA/Jockey	238	83118 bp	0.0035	149	64525 bp	0.0131	226	89591 bp	0.0038	161	75507 bp	0.0155
R2/R4/NeSL	121	58762 bp	0.0025	39	21504 bp	0.0044	177	63282 bp	0.0027	54	18588 bp	0.0038
RTE/Bov-B	513	205945 bp	0.0088	141	70683 bp	0.0143	511	195242 bp	0.0083	133	57305 bp	0.0117
L1/CIN4	187	64904 bp	0.0028	91	35036 bp	0.0071	184	56923 bp	0.0024	80	26792 bp	0.0055
LTR elements:	1550	501865 bp	0.0214	588	251376 bp	0.0509	1560	465596 bp	0.0198	537	259798 bp	0.0532
BEL/Pao	133	59797 bp	0.0025	52	31744 bp	0.0064	130	50145 bp	0.0021	41	13390 bp	0.0027
Ty1/Copia	76	16003 bp	0.0007	31	24049 bp	0.0049	80	14655 bp	0.0006	19	7226 bp	0.0015
Gypsy/DIRS1	321	191691 bp	0.0082	210	88725 bp	0.018	292	132545 bp	0.0056	196	110108 bp	0.0226
Retroviral	105	23692 bp	0.001	79	46111 bp	0.0093	133	48059 bp	0.002	114	81657 bp	0.0167
DNA transposons	21217	4213074 bp	0.1793	4077	904772 bp	0.1831	21032	4175965 bp	0.1777	3929	826496 bp	0.1694
hobo-Activator	6622	1512464 bp	0.0644	1866	457135 bp	0.0925	6559	1504262 bp	0.064	1874	410893 bp	0.0842
Tc1-IS630-Pogo	11153	2010477 bp	0.0856	905	160669 bp	0.0325	11057	2004425 bp	0.0853	845	154632 bp	0.0317
En-Spm	0	0 bp	0	0	0 bp	0	0	0 bp	0	0	0 bp	0
MULE-MuDR	31	6043 bp	0.0003	16	3663 bp	0.0007	38	7105 bp	0.0003	16	3777 bp	0.0008
PiggyBac	82	22329 bp	0.001	40	11810 bp	0.0024	78	21300 bp	0.0009	25	4738 bp	0.001
Tourist/Harbinger	737	163886 bp	0.007	304	75303 bp	0.0152	718	162720 bp	0.0069	284	67667 bp	0.0139
Other (Mirage,	65	16710 bp	0.0007	34	8356 bp	0.0017	71	16557 bp	0.0007	26	6523 bp	0.0013
Rolling-circles	446	113123 bp	0.0048	428	275699 bp	0.0558	502	157808 bp	0.0067	383	267895 bp	0.0549
Unclassified:	10050	1824421 bp	0.0776	2843	642039 bp	0.13	10072	1832821 bp	0.078	2722	596481 bp	0.1223
Total interspersed repeats	-	7586448 bp	0.3228	-	2329435 bp	0.4715	-	7518937 bp	0.32	-	2231101 bp	0.4573
Small RNA:	206	30872 bp	0.0013	45	4902 bp	0.001	221	40206 bp	0.0017	36	11816 bp	0.0024
Satellites:	42	5493 bp	0.0002	27	4037 bp	0.0008	40	6498 bp	0.0003	33	6218 bp	0.0013
Simple repeats:	7931	345476 bp	0.0147	1226	141375 bp	0.0286	7906	347785 bp	0.0148	1208	121809 bp	0.025
Low complexity:	1098	47625 bp	0.002	126	7489 bp	0.0015	1058	46081 bp	0.002	123	7032 bp	0.0014
Total masked	-	8115288 bp	0.3453	-	2759414 bp	0.5585	-	8102492 bp	0.3448	-	2642825 bp	0.5417
