# Supplementary material for: Identification of the male-specific region on the guppy Y Chromosome from a haplotype-resolved assembly
Source: Genome Res. 2025 Mar;35(3):489–98. doi: 10.1101/gr.279582.124 (PMC11960691; doi:10.1101/gr.279582.124)
Supplement: Supplement 4 [file Supplemental_Table_S4.xlsx]

## Sheet: Sheet1
Supplemental_Table_S4: Ygua Genes expressed with male bias
Ymac_start	Ymac_end	Ymac_ID	Ygua_start	Ygua_end	Ygua_ID	GUA GENE NAME	DE_transcript 3 organs*	DE_transcript_gonad
323846	366651	g9	352859	393084	g11	serine palmitoyltransferase 1 [P.reticulata]		comp81990_c0_m.232888
907661	910930	g24	980094	983363	g25	UN C9orf172-like [P.reticulata]	CUFF_2364_m.59873, comp81613_c2_m.224138	CUFF_2364_m.59873, comp81613_c2_m.224138
1201496	1216613	g35	1266635	1281884	g34	none		CUFF_36532_m.324294 CUFF_36532_m.324289
2335674	2341500	g69	2390321	2397629	g66	neuropeptide Y receptor type 1-like isoform X1 [P.reticulata]	CUFF_2477_m.60526	CUFF_2477_m.60526
3108337	3108798	g101	3193044	3193505	g98	polyubiquitin-like isoform X1 [P.reticulata]	CUFF_2514_m.60588	CUFF_2514_m.60588
3732899	3736322	g136	3831809	3834930	g133	sialidase-4-like [P.reticulata]	CUFF_2561_m.61042	CUFF_2561_m.61042
3737881	3739518	g137	3839403	3842829	g134	sialidase-3-like [P.reticulata]		CUFF_2562_m.61047
3737881	3739518	g137	3844388	3846025	g135	sialidase-4-like [P.reticulata]	CUFF_2561_m.61041	CUFF_2561_m.61041
4207741	4234134	g164	4314670	4340891	g158	CAP-Gly domain-containing linker protein 1-like [P.reticulata]	comp69804_c1_m.84546	comp69804_c1_m.84546
5158306	5223524	g202	5287722	5290478	g196	proteinase-activated receptor 2 [P.reticulata]	CUFF_2666_m.61772	CUFF_2666_m.61772
6076698	6082992	g237	6239923	6246355	g231	transcription factor 7-like 1-B isoform X1 [P.reticulata]	CUFF_2725_m.62161	CUFF_2725_m.62161
6229563	6233355	g244	6388420	6392181	g238	transcription factor 7-like 1 [P.reticulata]	CUFF_2764_m.62453	CUFF_2764_m.62453
8228758	8230092	g290	8370062	8371396	g287	basal body-orientation factor 1-like [P.reticulata]		CUFF_2834_m.62815
8232963	8234399	g291	8374180	8375616	g288	basal body-orientation factor 1-like [P.reticulata]		CUFF_2840_m.62852
8244460	8248650	g293	8385635	8389790	g289	protein CutA homolog [P.reticulata]	CUFF_2846_m.62859	CUFF_2846_m.62859
9243067	9251900	g317	9336431	9345171	g314	alpha-N-acetyl-neuraminyl-2,3-beta-galactosyl-1,3-N-acetyl-galactosaminide alpha-2,6-sialyltransferase [P.reticulata]		comp36303_c0_m.17077
9819242	9830539	g335	9939326	9950625	g332	calmodulin-regulated spectrin-associated protein 1-B-like isoform X2 [P.reticulata]	comp81918_c0_m.231064	comp81918_c0_m.231064
10038045	10041848	g349	10149997	10156043	g346	homeodomain-interacting protein kinase 2-like [P.reticulata]	CUFF_3008_m.64182	CUFF_3008_m.64182
12069805	12084166	g425	12215246	12229573	g426	trimeric intracellular cation channel type B [P.reticulata]	CUFF_8694_m.77067	CUFF_8694_m.77067
12204915	12214118	g431	12341060	12350386	g432	protein FAM78A isoform X1 [P.reticulata]		CUFF_8698_m.77156
15218253	15221599	g519	15416115	15419391	g524	calcineurin B homologous protein 3-like [P.reticulata]	comp74881_c0_m.119123	comp74881_c0_m.119123
15243208	15244351	g522	15440859	15442000	g527	heat shock protein beta-1-like [P.reticulata]	CUFF_8543_m.75680	CUFF_8543_m.75680
15416348	15417939	g541	15615235	15616825	g546	MORN repeat-containing protein 3 [P.reticulata]	comp22249_c0_m.11106	comp22249_c0_m.11106
15530693	15538996	g547	15728780	15737069	g553	gamma-glutamyltranspeptidase 1-like [P.reticulata]	CUFF_8545_m.75894	CUFF_8545_m.75894
16263691	16388439	g598	16450561	16584800	g603	sodium/glucose cotransporter 1-like [P.latipinna]	comp81521_c0_m.222269	comp81521_c0_m.222269
16347249	16353480	g602	16535782	16542021	g606	protein FAM166B [P.reticulata]	comp21821_c0_m.10633	comp21821_c0_m.10633
16570895	16578615	g610	16760393	16776901	g613	coiled-coil domain-containing protein 80-like [P.reticulata]		comp82707_c0_m.248340
16676918	16688722	g617	16874470	16886291	g620	LOW QUALITY PROTEIN: MORN repeat-containing protein 5 [P.reticulata]	CUFF_8389_m.74530	CUFF_8389_m.74530
18639320	18643039	g677	18759681	18763413	g681	coiled-coil domain-containing protein 74B-like isoform X1 [P.reticulata]	CUFF_8253_m.73526	CUFF_8253_m.73526
18884258	18896175	g681	19017384	19029298	g686	putative helicase mov-10-B.1 isoform X1 [P.reticulata]	comp72649_c0_m.101825	comp72649_c0_m.101825
19227847	19246279	g694	19364776	19383639	g700	5-hydroxytryptamine receptor 4-like [P.reticulata]		comp82144_c3_m.236415
19273118	19276699	g697	19411879	19415464	g703	progestin and adipoQ receptor family member 3-like [P.reticulata]	CUFF_8253_m.73526	CUFF_8253_m.73526
19959892	19966535	g720	20104366	20111027	g725	katanin p60 ATPase-containing subunit A-like 2 isoform X1 [P.reticulata]	CUFF_8259_m.73588, comp80238_c0_m.195829	CUFF_8259_m.73588, comp80238_c0_m.195829
20557905	20559621	g726	20703452	20705162	g731	cystatin-S-like [P.mexicana]	CUFF_46003_m.325952	CUFF_46003_m.325952
20566711	20573326	g726	20723530	20726517	g732	cystatin-like [P.latipinna]	CUFF_8156_m.73311	CUFF_8156_m.73311
22099966	22144882	g756	22222602	22267378	g760	protein turtle homolog A-like [P.reticulata]	CUFF_48056_m.226861	CUFF_48056_m.226861
22872124	22889913	g787	22997115	23016034	g787	AT-hook-containing transcription factor isoform X1 [P.reticulata]	comp80384_c8_m.198732	comp80384_c8_m.198732
23793174	23796136	g806	23577725	23580685	g802	sperm-associated antigen 8-like [P.reticulata]	CUFF_47932_m.226454	CUFF_47932_m.226454
24806989	24821326	g835	24629546	24643954	g835	phospholipid-transporting ATPase ID-like [P.reticulata]		CUFF_17524_m.299838 CUFF_17524_m.299840
24838043	24840949	g838	24660681	24665439	g838	serine/threonine-protein kinase NIM1-like [P.reticulata]		CUFF_17416_m.299650
26568289	26572876	g985	26574475	26579107	g1023	flagellar WD repeat-containing protein Pf20-like [P. reticulata]	comp80583_c0_m.202577	comp80583_c0_m.202577
26803587	26804707	g970	26990193	26991313	g993	N-terminal Xaa-Pro-Lys N-methyltransferase 1 [P. reticulata]	CUFF_23479_m.314029	CUFF_23479_m.314029
27034277	27037912	g944	27233803	27237441	g967	WD repeat-containing protein 34 [P. reticulata]	CUFF_23532_m.314117, CUFF_23541_m.314126, comp82262_c5_m.239279,	CUFF_23532_m.314117, CUFF_23541_m.314126, comp82262_c5_m.239279,
27302394	27309962	g927	27453812	27462891	g949	LMBR1 domain-containing protein 2 [X. maculatus]		CUFF_702_m.4549
27329422	27332468	g923	27484292	27487357	g945	cilia- and flagella-associated protein 53 [P. reticulata]	comp80096_c0_m.193221, comp80096_c0_m.193222, CUFF_23730_m.315204	comp80096_c0_m.193221, comp80096_c0_m.193222, CUFF_23730_m.315204
*differentially expressed in brain, tail, and gonad. (Sharma et al. 2014)
Blue highlight: potential function in sperm structure
