# Supplementary material for: Identification of the male-specific region on the guppy Y Chromosome from a haplotype-resolved assembly
Source: Genome Res. 2025 Mar;35(3):489–98. doi: 10.1101/gr.279582.124 (PMC11960691; doi:10.1101/gr.279582.124)
Supplement: Supplement 5 [file Supplemental_Table_S5.xlsx]

## Sheet: Sheet1
Supplemental Table S5: Genes annotated on Ymac and Ygua
Maculatus				Guanapo
Gene_start	Gene_end	Mac_ID		Gene_start	Gene_end	Gua_ID	GENE NAME
				39601	41721	g1	UN LOC106911668, partial [P.mexicana]
54734	163193	g1		58731	162946	g2	chromodomain-helicase-DNA-binding protein 1 isoform X1 [P.reticulata]
115371	116019	g2		122632	123280	g3	chromodomain-helicase-DNA-binding protein 1-like [P.mexicana]
122960	123630	g3		130160	130830	g4	chromodomain-helicase-DNA-binding protein 1 isoform X1 [P.reticulata]
194068	229387	g4		211188	244112	g5	tyrosine-protein kinase SYK isoform X1 [P.reticulata]
219249	223809	g5		234672	238473	g6	tyrosine-protein kinase SYK-like [P.latipinna]
				280645	282243	g7	UN LOC103460807 [P.reticulata]
269135	294501	g6		297176	318544	g8	methylglutaconyl-CoA hydratase, mitochondrial [P.reticulata]
290501	292994	g7		314548	314991	g9	UN LOC115560068 [Gadus morhua]
307115	308266	g8		331400	332551	g10	nuclear factor interleukin-3-regulated protein [P.reticulata]
323846	366651	g9		352859	393084	g11	serine palmitoyltransferase 1 [P.reticulata]
378951	433506	g10		405239	458479	g12	lamin-B1 [P.reticulata]
403102	403341	g11		429439	429678	g13	zinc finger BED domain-containing protein 5-like, partial [Notothenia coriiceps]
501168	622575	g12		499378	645272	g14	multiple epidermal growth factor-like domains protein 10 isoform X1 [P.reticulata]
538577	539194	g13		520129	520835	g15	UN LOC106910989, partial [P.mexicana]
593005	593685	g14		635048	635728	g16	UN LOC108167014, partial [P.reticulata]
593879	597345	g15		635922	639452	g17	UN LOC103476632 [P.reticulata]
593925	597345	g16		636025	639452	g18	UN LOC106906343 [P.mexicana]
				636250	639452	g19	UN LOC103476632 [P.reticulata]
621082	666949	g17		663195	708157	g20	protein PRRC1 [P.reticulata]
747455	748307	g18		849707	850983	g21	UN LOC116716708 [Xiphophorus hellerii]
774909	776185	g19					UN LOC116716708 [Xiphophorus hellerii]
778827	781134	g20		853643	855974	g22	UN LOC103473106 isoform X1 [P.reticulata]
784402	862590	g21		859242	937085	g23	solute carrier family 12 member 2 isoform X1 [P.reticulata]
869905	873991	g22		944404	948493	g24	UPF0258 protein KIAA1024-like homolog [P.reticulata]
888242	1016741	g23					-
907661	910930	g24		980094	983363	g25	UN C9orf172-like [P.reticulata]
917824	942131	g25		990321	1014546	g26	target of rapamycin complex 2 subunit MAPKAP1 isoform X2 [P.reticulata]
949125	950120	g26		1021875	1022874	g27	UN LOC106526300 [Austrofundulus limnaeus]
953819	972464	g27		1026665	1046220	g28	multivesicular body subunit 12B isoform X1 [P.reticulata]
1002895	1089202	g28		1081102	1163874	g29	LIM homeobox transcription factor 1-beta-like isoform X1 [P.formosa]
1044731	1048267	g29		1120114	1127072	g30	predicted GPI-anchored protein 58 [P.mexicana]
1104086	1117277	g30		1181690	1192078	g31	nuclear receptor subfamily 5 group A member 2-like isoform X1 [P.reticulata]
1111661	1141866	g31					UN LOC113119923 [Carassius auratus]
1122324	1133558	g32		1197114	1208422	g32	proteasome subunit beta type-7 isoform X2 [P.reticulata]
1135381	1136502	g33					serine/threonine-protein kinase Nek6-like [Xiphophorus maculatus]
1156176	1190885	g34		1210214	1257295	g33	DENN domain-containing protein 1A isoform X1 [P.reticulata]
1201496	1216613	g35		1266635	1281884	g34	-
1219179	1287048	g36		1284447	1352576	g35	talin-1 isoform X3 [P.mexicana]
1306210	1313383	g37		1371770	1378946	g36	hydroxymethylglutaryl-CoA synthase, cytoplasmic-like isoform X1 [P.reticulata]
1330457	1373771	g38		1396040	1439054	g37	probable ATP-dependent RNA helicase YTHDC2 isoform X1 [P.reticulata]
1378148	1389108	g39		1443430	1454284	g38	m7GpppN-mRNA hydrolase isoform X1 [P.reticulata]
1392589	1395555	g40		1457765	1460689	g39	histone H3.3-like [P.reticulata]
1399495	1405566	g41		1464619	1470635	g40	proteasome subunit beta type-7 [P.reticulata]
1409471	1426243	g42		1474590	1491259	g41	interleukin-6 receptor subunit beta [P.reticulata]
1429865	1430899	g43		1494890	1495924	g42	purine-rich element-binding protein gamma [P.mexicana]
1459985	1474043	g44		1524972	1539038	g43	sodium-coupled neutral amino acid transporter 9 [P.reticulata]
1480743	1502940	g45		1545738	1567822	g44	pro-neuregulin-1, membrane-bound isoform isoform X2 [P.reticulata]
1505931	1536638	g46		1570810	1602166	g45	malignant fibrous histiocytoma-amplified sequence 1 [P.reticulata]
1541253	1545497	g47		1610015	1614281	g46	60S ribosomal protein L17 [P.latipinna]
1550479	1552195	g48		1619299	1620998	g47	homeobox protein Nkx-6.1 [P.latipinna]
1724327	1733514	g49		1791820	1801016	g48	glycerol-3-phosphate acyltransferase 3 [P.reticulata]
1734658	1741579	g50		1802168	1809320	g49	BRCA1-A complex subunit Abraxas [P.reticulata]
1742091	1743897	g51		1809832	1811637	g50	28S ribosomal protein S18c, mitochondrial [P.reticulata]
1744873	1752879	g52		1812547	1820539	g51	helicase POLQ-like [P.reticulata]
1762674	1783498	g53		1830354	1851025	g52	transcription factor 7-like 1-A isoform X1 [P.reticulata]
1788338	1790525	g54		1856139	1858138	g53	caspase-3-like [P.reticulata]
1793412	1802113	g55		1861411	1870481	g54	RNA/RNP complex-1-interacting phosphatase-like [P.reticulata]
1804000	1820769	g56		1872408	1881788	g55	V-type proton ATPase subunit B, brain isoform [P.mexicana]
1915018	2037049	g57		1971401	2100103	g56	GDNF family receptor alpha-2 isoform X1 [P.reticulata]
2116405	2121611	g58		2173020	2180448	g57	UN LOC103473143 [P.reticulata]
2121770	2123820	g59					probable serine/threonine-protein kinase irlF [P.latipinna]
2135238	2161772	g60		2190117	2217971	g58	exportin-7 [Xiphophorus maculatus]
2165665	2167449	g61		2222837	2224621	g59	protein PBDC1 [P.reticulata]
2174172	2184026	g62		2231339	2241152	g60	dematin-like isoform X1 [P.reticulata]
2189347	2207397	g63		2246494	2264472	g61	serine/threonine-protein phosphatase 2B catalytic subunit alpha isoform-like isoform X3 [P.reticulata]
2227360	2242257	g64		2284421	2299618	g62	heparanase [P.reticulata]
2244974	2256768	g65		2302310	2314349	g63	drebrin-like protein A isoform X1 [P.reticulata]
2264916	2266507	g66		2323013	2324579	g64	cytochrome c oxidase subunit 5B, mitochondrial-like [P.reticulata]
2268468	2271304	g67		2326540	2329422	g65	cytochrome c oxidase subunit 5B, mitochondrial-like [P.reticulata]
2319216	2322602	g68					-
2335674	2341500	g69		2390321	2397629	g66	neuropeptide Y receptor type 1-like isoform X1 [P.reticulata]
2362510	2370879	g70		2418718	2426978	g67	beta-centractin isoform X1 [Fundulus heteroclitus]
2370690	2381097	g71		2426789	2437736	g68	E3 ubiquitin-protein ligase MARCH5-like isoform X1 [P.reticulata]
2416202	2432461	g72		2472615	2489010	g69	fibroblast growth factor receptor 1-A-like isoform X1 [P.reticulata]
2440493	2443905	g73		2496943	2500352	g70	stanniocalcin-like [P.reticulata]
2447087	2449116	g74		2503700	2505747	g71	EKC/KEOPS complex subunit LAGE3 [P.reticulata]
2452926	2460919	g75		2509590	2517591	g72	receptor expression-enhancing protein 5-like [P.reticulata]
2464460	2472844	g76		2521127	2529525	g73	UN LOC106922490 [P.mexicana]
2473574	2482166	g77		2530255	2538817	g74	thyrotropin receptor-like isoform X1 [P.reticulata]
2485528	2487291	g78		2542127	2543875	g75	protein O-mannose kinase [P.reticulata]
2489720	2511409	g79		2546267	2571281	g76	peptidyl-glycine alpha-amidating monooxygenase isoform X1 [P.reticulata]
2516550	2538099	g80		2576323	2597927	g77	protein crumbs homolog 2-like [P.reticulata]
2541364	2552146	g81		2604173	2610268	g78	F-box/WD repeat-containing protein 2 [P.reticulata]
2554713	2561080	g82		2612836	2619418	g79	WD repeat domain phosphoinositide-interacting protein 4 [P.reticulata]
2566342	2574350	g83		2621301	2629314	g80	zinc metalloproteinase nas-4-like [P.reticulata]
2579903	2582588	g84		2635055	2637799	g81	zinc finger CCHC domain-containing protein 9 [P.mexicana]
2595457	2614849	g85		2658327	2677459	g82	DNA repair protein XRCC4-like [P.reticulata]
2621401	2652704	g86		2684051	2715409	g83	versican core protein-like [P.reticulata]
2662447	2672880	g87		2725209	2735585	g84	hyaluronan and proteoglycan link protein 1-like [P.reticulata]
2691175	2691872	g88		2753580	2754265	g85	UN LOC109092080 [Cyprinus carpio]
2696347	2700212	g89		2758436	2763882	g86	centrin-3 [P.reticulata]
2731206	2747843	g90		2796473	2813011	g87	myocyte-specific enhancer factor 2C-like [P.reticulata]
2761417	2769856	g91		2827023	2835485	g88	arrestin domain-containing protein 3-like [P.reticulata]
2781493	2814201	g92		2851670	2883870	g89	multiple C2 and transmembrane domain-containing protein 1-like isoform X1 [P.reticulata]
2817916	2829080	g93		2887526	2898735	g90	septin-5-like [Xiphophorus maculatus]
2847197	2848023	g94		2917333	2918163	g91	claudin-5-like [P.reticulata]
2851019	2857767	g95		2921182	2927940	g92	short-chain specific acyl-CoA dehydrogenase, mitochondrial [P.reticulata]
2859229	2863178	g96		2929405	2933332	g93	beta-crystallin B1 [Xiphophorus maculatus]
2870925	2872198	g97		2941020	2942289	g94	beta-crystallin A4 [Xiphophorus maculatus]
2881530	2952671	g98		2951570	3022829	g95	beta-adrenergic receptor kinase 2 isoform X1 [P.reticulata]
2963636	3017364	g99		3032967	3093172	g96	unconventional myosin-XVIIIb isoform X1 [P.reticulata]
3037422	3099852	g100		3122991	3184944	g97	seizure 6-like protein isoform X1 [Xiphophorus couchianus]
3108337	3108798	g101		3193044	3193505	g98	polyubiquitin-like isoform X1 [P.reticulata]
3113818	3151382	g102		3198567	3236345	g99	electrogenic sodium bicarbonate cotransporter 4-like isoform X8 [P.reticulata]
3165236	3178297	g103		3248275	3260874	g100	substance-P receptor-like [P.reticulata]
3185753	3205641	g104		3268315	3288211	g101	scavenger receptor class B member 1 isoform X1 [P.reticulata]
3217250	3232572	g105		3299858	3312247	g102	G protein-coupled receptor kinase 6-like [P.reticulata]
3234211	3244739	g106		3313867	3324382	g103	set1/Ash2 histone methyltransferase complex subunit ASH2 isoform X2 [P.reticulata]
3252987	3269824	g107		3332667	3351473	g104	inactive carboxypeptidase-like protein X2 isoform X1 [P.reticulata]
3272847	3281617	g108		3354452	3363014	g105	probable ATP-dependent RNA helicase DDX56 [P.reticulata]
3282728	3285156	g109		3364122	3366521	g106	dual specificity protein phosphatase 26-like [P.reticulata]
3292124	3294162	g110		3373495	3375535	g107	peptidyl-prolyl cis-trans isomerase A [P.reticulata]
3298679	3323480	g111		3380062	3404891	g108	zinc finger MIZ domain-containing protein 2 [P.reticulata]
3345930	3356468	g112		3427212	3439062	g109	poly(ADP-ribose) glycohydrolase-like [P.reticulata]
3358620	3379544	g113		3441216	3462353	g110	2-oxoglutarate dehydrogenase, mitochondrial [P.reticulata]
3388894	3435730	g114		3471792	3512918	g111	calcium/calmodulin-dependent protein kinase type II subunit beta isoform X1 [P.reticulata]
3437313	3441383	g115		3474058	3474562	g112	calcium-activated potassium channel subunit beta-2 isoform X1 [Xiphophorus couchianus]
3442715	3445020	g116		3512724	3520428	g113	calcium/calmodulin-dependent protein kinase type II subunit beta-like [Monopterus albus]
3459154	3460768	g117		3522015	3526083	g114	nudC domain-containing protein 3 [P.reticulata]
3463629	3464579	g118		3527404	3529684	g115	28S ribosomal protein S24, mitochondrial [P.reticulata]
3463753	3464065	g119		3540583	3542203	g116	myosin-6-like, partial [P.reticulata]
3467113	3468246	g120		3560366	3573375	g117	N-acetylglucosamine-6-sulfatase-like [P.reticulata]
3478804	3491835	g121		3568319	3570531	g118	N-acetylglucosamine-6-sulfatase-like [P.reticulata]
3500222	3508161	g122		3595804	3603742	g119	DNA-directed DNA/RNA polymerase mu [P.reticulata]
3518773	3521472	g123		3614406	3617105	g120	homeobox protein pv.1-like [P.reticulata]
3524260	3525174	g124		3619864	3620778	g121	transcriptional activator protein Pur-beta [P.reticulata]
3536248	3540789	g125		3631845	3636372	g122	interleukin-1 beta-like isoform X1 [P.reticulata]
3554004	3570268	g126		3649455	3666776	g123	metal transporter CNNM3 isoform X2 [P.reticulata]
3573796	3575134	g127		3670281	3671619	g124	sialidase-4-like [P.reticulata]
3585489	3606106	g128		3681994	3702542	g125	metal transporter CNNM4 isoform X1 [P.reticulata]
3604493	3606067	g129		3700926	3769648	g126	metal transporter CNNM4 isoform X1 [P.reticulata]
3609084	3619318	g130		3705521	3715787	g127	SEC14-like protein 2 [P.reticulata]
3639493	3655872	g131		3719715	3720610	g128	zinc finger FYVE domain-containing protein 16 [P.reticulata]
				3739106	3757221	g129	zinc finger FYVE domain-containing protein 16 [P.reticulata]
3660294	3665631	g132		3761932	3767329	g130	ubiquitin-conjugating enzyme E2 L3 [P.mexicana]
3666755	3676994	g133		3768444	3780214	g131	creatine kinase S-type, mitochondrial [P.formosa]
3682142	3716319	g134		3785374	3823605	g132	ras-specific guanine nucleotide-releasing factor 2-like isoform X1 [P.reticulata]
3725368	3728420	g135		3831809	3834930	g133	sialidase-4-like [P.reticulata]
3732899	3736322	g136		3839403	3842829	g134	sialidase-3-like [P.reticulata]
3737881	3739518	g137		3844388	3846025	g135	sialidase-4-like [P.reticulata]
3747761	3750943	g138					UN LOC116723822 isoform X1 [Xiphophorus hellerii]
3747761	3750943	g139					UN LOC116723822 isoform X1 [Xiphophorus hellerii]
3753179	3764275	g140		3864924	3876006	g136	tricarboxylate transport protein, mitochondrial isoform X1 [P.reticulata]
3766613	3795009	g141		3878341	3906070	g137	phosphatidylinositol 4-kinase alpha-like isoform X1 [P.reticulata]
3799657	3801952	g142					LOW QUALITY PROTEIN: phosphatidylinositol 4-kinase alpha-like [Cyprinodon variegatus]
3820105	3829295	g143		3924288	3932569	g138	MARVEL domain-containing protein 2-like [P.reticulata]
3835797	3845691	g144		3939036	3948890	g139	occludin-like [P.reticulata]
3836641	3837318	g145					occludin-like [P.reticulata]
3848044	3849636	g146		3951225	3952814	g140	ankyrin repeat domain-containing protein 34B-like [P.reticulata]
3869792	3882355	g147		3973165	3985683	g141	voltage-dependent anion-selective channel protein 2-like isoform X2 [P.reticulata]
3887350	3893015	g148		3990751	3994803	g142	torsin-4A isoform X1 [P.reticulata]
3904201	3921059	g149		4005945	4022861	g143	BRCA1-associated protein isoform X1 [P.reticulata]
3923905	3937266	g150		4025728	4039057	g144	N-alpha-acetyltransferase 25, NatB auxiliary subunit isoform X2 [P.reticulata]
3942991	3958351	g151		4044778	4060185	g145	phosphatidylinositol transfer protein beta isoform-like isoform X2 [P.reticulata]
3962480	4081667	g152		4064469	4185984	g146	tetratricopeptide repeat protein 28-like isoform X1 [P.reticulata]
4057523	4058738	g153		4161557	4162772	g147	UN LOC103468142 isoform X1 [P.reticulata]
4084470	4092826	g154		4188776	4197017	g148	group 3 secretory phospholipase A2-like isoform X1 [P.reticulata]
4095453	4112202	g155		4199818	4215704	g149	rabphilin-3A-like isoform X1 [P.reticulata]
4136642	4149163	g156		4238985	4252534	g150	tyrosine-protein phosphatase non-receptor type 11 isoform X2 [P.latipinna]
4150921	4156330	g157		4254294	4259661	g151	transmembrane emp24 domain-containing protein 2 isoform X2 [P.latipinna]
4166833	4172092	g158		4276025	4277203	g152	cadherin-1-like [P.formosa]
4173237	4179429	g159		4278338	4284505	g153	ATP-dependent RNA helicase DDX55 [P.mexicana]
4179463	4183806	g160		4284539	4291135	g154	translation initiation factor eIF-2B subunit alpha isoform X2 [Xiphophorus couchianus]
4186316	4192718	g161		4293645	4300026	g155	B-cell CLL/lymphoma 7 protein family member A [Xiphophorus maculatus]
4196773	4200347	g162		4304084	4307663	g156	density-regulated protein isoform X1 [P.latipinna]
4201053	4202042	g163		4308369	4309358	g157	hydroxycarboxylic acid receptor 3-like [P.reticulata]
4207741	4234134	g164		4314670	4340891	g158	CAP-Gly domain-containing linker protein 1-like [P.reticulata]
4240682	4249030	g165		4347479	4355851	g159	coiled-coil domain-containing protein 62 isoform X1 [P.reticulata]
4249792	4267234	g166		4356611	4374038	g160	huntingtin-interacting protein 1-related protein-like isoform X1 [P.reticulata]
4270175	4287337	g167		4376974	4394099	g161	F-box DNA helicase 1 isoform X2 [P.reticulata]
4291391	4302961	g168		4398175	4408618	g162	UN LOC103473251 isoform X4 [P.reticulata]
4305904	4318586	g169		4411567	4424321	g163	RILP-like protein 1 isoform X1 [P.reticulata]
4326328	4334118	g170		4432740	4440400	g164	N-lysine methyltransferase KMT5A [P.reticulata]
4337920	4355808	g171		4444257	4462149	g165	protein strawberry notch homolog 1 isoform X1 [P.reticulata]
4359662	4361255	g172		4466051	4467640	g166	cyclin-dependent kinase 2-associated protein 1 isoform X1 [Xiphophorus maculatus]
4364739	4382186	g173		4472954	4497475	g167	M-phase phosphoprotein 9 isoform X1 [P.reticulata]
4412839	4444749	g174		4528118	4558103	g168	membrane-associated phosphatidylinositol transfer protein 2-like isoform X1 [P.reticulata]
4453031	4467143	g175		4566448	4580790	g169	kinesin-like protein KIF2A [P.reticulata]
4494468	4546889	g176		4609397	4659586	g170	zinc finger SWIM domain-containing protein 6-like [P.reticulata]
4566131	4571476	g177		4678885	4684124	g171	S-adenosylmethionine synthase-like [Xiphophorus maculatus]
4573355	4579564	g178		4686010	4692219	g172	vesicle-associated membrane protein 8-like isoform X1 [P.reticulata]
4581716	4584515	g179		4694383	4697173	g173	heterogeneous nuclear ribonucleoprotein D0-like [P.reticulata]
4586129	4588505	g180		4698825	4701190	g174	enolase-phosphatase E1 isoform X1 [P.reticulata]
4591629	4595472	g181		4704288	4708155	g175	transmembrane protein 150C [P.reticulata]
4599806	4622011	g182		4712525	4736587	g176	protein transport protein Sec31A [P.reticulata]
4628926	4637755	g183		4743284	4752095	g177	protein lin-54 homolog [P.reticulata]
4641189	4648470	g184		4755618	4762898	g178	COP9 signalosome complex subunit 4 [P.reticulata]
4658219	4661164	g185		4772695	4775635	g179	placenta-specific gene 8 protein [P.reticulata]
4669687	4751807	g186		4785968	4878258	g180	A disintegrin and metalloproteinase with thrombospondin motifs 6 isoform X2 [Xiphophorus maculatus]
4756754	4759130	g187		4827588	4836103	g181	-
				4883281	4885712	g182	-
4771164	4803408	g188		4897840	4931915	g183	peptidyl-prolyl cis-trans isomerase CWC27 homolog [P.reticulata]
4803957	4810545	g189		4932465	4939058	g184	peptidylprolyl isomerase domain and WD repeat-containing protein 1 [P.formosa]
4812209	4818314	g190		4940728	4946824	g185	E3 ubiquitin-protein ligase TRIM23 [P.reticulata]
4819039	4821185	g191		4947548	4949685	g186	mitotic-spindle organizing protein 2-like isoform X1 [P.reticulata]
4923167	4943516	g192		5055764	5075896	g187	LIM/homeobox protein Lhx5 [P.mexicana]
4985847	4987145	g193		5118941	5120239	g188	beta-1,3-galactosyl-O-glycosyl-glycoprotein beta-1,6-N-acetylglucosaminyltransferase 4 [P.reticulata]
5003445	5012190	g194		5136861	5145609	g189	3-hydroxy-3-methylglutaryl-coenzyme A reductase [P.reticulata]
5015569	5040151	g195		5149089	5173272	g190	collagen type IV alpha-3-binding protein-like isoform X1 [P.formosa]
5083849	5114346	g196		5215586	5246718	g191	synaptic vesicle glycoprotein 2C-like [P.reticulata]
5122800	5124949	g197		5255202	5257352	g192	proteinase-activated receptor 3-like [P.reticulata]
5140133	5143375	g198		5272159	5275403	g193	proteinase-activated receptor 1-like [P.reticulata]
5142272	5265708	g199		5274300	5401999	g194	proteinase-activated receptor 1-like [P.reticulata]
5145207	5148112	g200					proteinase-activated receptor 2-like [P.reticulata]
5156585	5159361	g201		5277238	5280128	g195	proteinase-activated receptor 2 [P.reticulata]
5158306	5223524	g202		5287722	5290478	g196	proteinase-activated receptor 2 [P.reticulata]
5161832	5162266	g203		5292949	5293383	g197	Ig kappa chain V region K16-167 [P.formosa]
5163345	5163557	g204		5294462	5294674	g198	immunoglobulin kappa light chain-like [Salarias fasciatus]
5166534	5167454	g205		5297617	5298537	g199	cholesterol 25-hydroxylase-like protein 2 [P.reticulata]
5170937	5175883	g206		5302078	5307031	g200	protein S100-Z isoform X2 [P.reticulata]
5184754	5189730	g207		5323476	5328381	g201	corticotropin-releasing factor-binding protein [P.reticulata]
5204461	5248675	g208		5343141	5387372	g202	high affinity cAMP-specific and IBMX-insensitive 3',5'-cyclic phosphodiesterase 8B isoform X1 [P.reticulata]
5252954	5263919	g209		5391662	5400799	g203	WD repeat-containing protein 41 [P.reticulata]
5280783	5285237	g210		5417062	5421490	g204	homeobox protein orthopedia isoform X1 [P.reticulata]
5293793	5302523	g211		5429999	5438245	g205	tubulin-specific chaperone A [Xiphophorus maculatus]
5355494	5423554	g212		5490950	5572078	g206	AP-3 complex subunit beta-1 isoform X1 [P.reticulata]
5425187	5437150	g213		5573697	5585977	g207	secretory carrier-associated membrane protein 1 isoform X1 [P.reticulata]
5443698	5450950	g214		5592407	5599650	g208	lipoma HMGIC fusion partner-like 2 protein [P.reticulata]
5495222	5495669	g215		5643467	5643914	g209	-
5499341	5517779	g216		5647590	5665861	g210	arylsulfatase B [P.reticulata]
5518990	5533139	g217		5667096	5681207	g211	dimethylglycine dehydrogenase, mitochondrial [P.reticulata]
5537593	5544200	g218		5685672	5692311	g212	betaine--homocysteine S-methyltransferase 1-like [P.reticulata]
5540062	5607758	g219		5688139	5758045	g213	-
5548527	5570845	g220		5696645	5719917	g214	junction-mediating and -regulatory protein [P.reticulata]
5575026	5592565	g221		5724102	5742930	g215	homer protein homolog 1 isoform X2 [P.reticulata]
5595601	5607758	g222		5745961	5748587	g216	cardiomyopathy-associated protein 5 [P.reticulata]
5606010	5731100	g223		5756297	5784262	g217	zinc finger protein 502-like [P.reticulata]
5606292	5708604	g224		5756579	5864520	g218	-
5610316	5613000	g225		5760611	5763267	g219	DTW domain-containing protein 2 [P.reticulata]
5629416	5644000	g226		5786028	5800480	g220	nucleolysin TIA-1-like isoform X1 [P.reticulata]
5649068	5654795	g227		5805555	5811287	g221	UN C2orf42 homolog [P.reticulata]
5763599	5766926	g228		5923335	5926661	g222	zinc finger protein 703-like [P.reticulata]
5782328	5792077	g229		5943776	5953489	g223	GRAM domain-containing protein 3-like isoform X2 [P.reticulata]
5796233	5804610	g230		5957674	5966070	g224	TNF receptor-associated factor 2-like [P.reticulata]
5828466	5833221	g231		5990059	5994874	g225	-
5839079	5876260	g232		6000731	6037958	g226	tenascin-like isoform X1 [P.reticulata]
5839124	5848792	g233		6000776	6010301	g227	tenascin-like isoform X7 [P.reticulata]
5841576	5848792	g234		6003133	6010301	g228	tenascin-like isoform X7 [P.reticulata]
5906700	5925812	g235		6067784	6086895	g229	phosphatidylinositol 3-kinase regulatory subunit alpha isoform X1 [P.reticulata]
5977103	6071674	g236		6137959	6234904	g230	microtubule-associated serine/threonine-protein kinase 4 isoform X3 [P.reticulata]
6076698	6082992	g237		6239923	6246355	g231	transcription factor 7-like 1-B isoform X1 [P.reticulata]
6094540	6103833	g238		6257827	6267136	g232	interleukin-31 receptor subunit alpha-like [P.reticulata]
6107255	6120267	g239		6270570	6283001	g233	splicing regulatory glutamine/lysine-rich protein 1 isoform X1 [P.reticulata]
6124542	6155417	g240		6287276	6318055	g234	protein LAP2 isoform X1 [P.reticulata]
6183045	6197605	g241		6345636	6355191	g235	neurolysin, mitochondrial isoform X1 [P.reticulata]
6199369	6206891	g242		6359945	6367464	g236	small glutamine-rich tetratricopeptide repeat-containing protein beta [P.reticulata]
6214140	6223831	g243		6373009	6382709	g237	trafficking protein particle complex subunit 13 isoform X2 [P.reticulata]
6229563	6233355	g244		6388420	6392181	g238	transcription factor 7-like 1 [P.reticulata]
6235371	6238544	g245		6394245	6397436	g239	UN LOC103473337 [P.reticulata]
6238017	6239457	g246		6396909	6398349	g240	UN LOC103473337 [P.reticulata]
6245330	6272782	g247		6404215	6431566	g241	tumor necrosis factor receptor superfamily member 10B-like [P.reticulata]
6303877	6527186	g248		6462829	6562037	g242	netrin receptor UNC5D-like isoform X1 [Xiphophorus hellerii]
6579845	6580520	g249		6735126	6735801	g243	UN LOC103130057 isoform X1 [P.formosa]
6673120	6676029	g250		6828535	6831482	g244	UN LOC103473502 [P.reticulata]
6679093	6696028	g251		6834571	6873471	g245	rhotekin-like isoform X1 [P.formosa]
6703048	6714125	g252		6880479	6891563	g246	transcription factor TFIIIB component B'' homolog isoform X1 [P.reticulata]
6721407	6725172	g253		6898846	6902630	g247	UN LOC103473345 isoform X2 [P.reticulata]
6729386	6735608	g254		6906844	6913046	g248	disabled homolog 2 isoform X1 [P.reticulata]
				6907625	6909524	g249	disabled homolog 2 isoform X1 [P.reticulata]
6745911	6750134	g255		6923225	6927449	g250	complement component C9 [P.reticulata]
6759847	6760596	g256		6937314	6938063	g251	growth arrest-specific protein 1-like [P.reticulata]
6790456	6793896	g257		6948585	6952022	g252	fructose-1,6-bisphosphatase 1-like [P.reticulata]
6796946	6808020	g258		6956830	6967944	g253	KN motif and ankyrin repeat domain-containing protein 1-like isoform X3 [P.reticulata]
6813311	6822392	g259		6973188	6982237	g254	probable global transcription activator SNF2L2 isoform X3 [P.reticulata]
6841837	6844164	g260		7002875	7005202	g255	neuropeptide FF receptor 2-like isoform X1 [P.latipinna]
6854615	6893305	g261		7015595	7054219	g256	electrogenic sodium bicarbonate cotransporter 1-like isoform X4 [Xiphophorus hellerii]
6894649	6899248	g262		7055562	7062819	g257	deoxycytidine kinase [P.reticulata]
6901951	6908419	g263		7065523	7071991	g258	MOB kinase activator 1B [Fundulus heteroclitus]
6911475	6933438	g264		7075048	7097095	g259	transportin-1 [P.reticulata]
6938778	6992580	g265		7102581	7156323	g260	F-BAR domain only protein 2 [P.reticulata]
7002750	7005529	g266		7166492	7169297	g261	transmembrane protein 174 [P.reticulata]
				7227949	7229260	g262	UN LOC111611927 isoform X2 [Xiphophorus maculatus]
				7228772	7229935	g263	UN LOC103911639 isoform X1 [Danio rerio]
7109726	7110808	g267		7257545	7258627	g264	forkhead box protein D1 [P.reticulata]
7133940	7135746	g268		7269842	7279084	g265	transcription factor BTF3 [Oryzias melastigma]
7140245	7143081	g269		7283577	7286351	g266	ankyrin repeat family A protein 2 [Fundulus heteroclitus]
7152620	7197571	g270		7295922	7340942	g267	rho guanine nucleotide exchange factor 28-like isoform X3 [Xiphophorus hellerii]
7304038	7304482	g271		7390508	7409561	g268	-
7335609	7337263	g272		7475619	7477269	g269	uveal autoantigen with coiled-coil domains and ankyrin repeats-like [P.reticulata]
7373226	7375001	g273		7512299	7514074	g270	ectoderm-neural cortex protein 1 [P.reticulata]
7388183	7395009	g274		7527195	7534024	g271	beta-hexosaminidase subunit beta isoform X2 [P.reticulata]
7395436	7401202	g275		7534454	7542065	g272	ribosome-releasing factor 2, mitochondrial isoform X2 [P.reticulata]
7401749	7404116	g276		7542638	7544996	g273	ribosome biogenesis protein NSA2 homolog [P.reticulata]
7405372	7409391	g277		7546271	7550597	g274	torsin-1A-like [P.reticulata]
7421817	7424404	g278		7564087	7566672	g275	torsin-1A-like isoform X1 [P.mexicana]
7457237	7464971	g279		7599168	7606888	g276	epidermal growth factor-like protein 7 isoform X2 [P.reticulata]
7469819	7483364	g280		7611740	7625312	g277	1-acyl-sn-glycerol-3-phosphate acyltransferase alpha-like [P.reticulata]
7499630	7550141	g281		7641591	7691881	g278	formin-binding protein 1 isoform X10 [P.reticulata]
7622203	7722648	g282		7763055	7864234	g279	collagen alpha-1(XI) chain-like isoform X2 [P.reticulata]
7768220	7769436	g283		7930472	7948148	g280	noelin isoform X1 [Xiphophorus maculatus]
7794981	7812654	g284		8123470	8129448	g281	protein phosphatase 1 regulatory subunit 26 isoform X2 [P.reticulata]
7969724	7975756	g285		8130235	8132871	g282	28S ribosomal protein S2, mitochondrial [P.reticulata]
7976477	7979140	g286		8140838	8145645	g283	protein FAM69B isoform X1 [P.reticulata]
7986506	7998821	g287		8152161	8334713	g284	disabled homolog 2-interacting protein isoform X1 [P.reticulata]
8006221	8193908	g288		8187360	8381851	g285	zinc finger protein OZF-like [P.reticulata]
8203089	8226748	g289		8343977	8368052	g286	tubulin polyglutamylase TTLL11 [P.reticulata]
8228758	8230092	g290		8370062	8371396	g287	basal body-orientation factor 1-like [P.reticulata]
8232963	8234399	g291		8374180	8375616	g288	basal body-orientation factor 1-like [P.reticulata]
8237578	8240671	g292		8385635	8389790	g289	protein CutA homolog [P.reticulata]
8244460	8248650	g293		8493710	8640065	g290	fibrinogen C domain-containing protein 1 isoform X1 [P.mexicana]
8350616	8497594	g294		8772243	8914526	g291	laminin subunit gamma-3-like [P.reticulata]
8681828	8682130	g295		8814080	8815913	g292	UN LOC103470805 [P.reticulata]
8689787	8818634	g296		8940954	8951040	g293	allograft inflammatory factor 1-like [P.reticulata]
8845079	8855166	g297		8960053	8970503	g294	5'-AMP-activated protein kinase catalytic subunit alpha-1 [P.latipinna]
8864258	8874668	g298		8965370	8966887	g295	5'-AMP-activated protein kinase catalytic subunit alpha-1 [Fundulus heteroclitus]
8878035	8892977	g299		8973871	8988178	g296	tetratricopeptide repeat protein 33 isoform X1 [P.reticulata]
8901873	8906067	g300		8997083	9001253	g297	prostaglandin E2 receptor EP4 subtype [P.reticulata]
8933010	8934433	g301		9028109	9029532	g298	-
8951024	8969559	g302		9046041	9064593	g299	microtubule-associated protein 1B [P.reticulata]
8976215	8980405	g303		9071228	9075412	g300	pentatricopeptide repeat-containing protein 2, mitochondrial [P.reticulata]
8985618	8989557	g304		9080609	9084540	g301	calcium channel flower homolog isoform X1 [Xiphophorus couchianus]
8996040	9049575	g305		9091022	9142037	g302	carboxyl-terminal PDZ ligand of neuronal nitric oxide synthase protein-like [P.reticulata]
				9162980	9164881	g303	G2/M phase-specific E3 ubiquitin-protein ligase-like [P.latipinna]
				9165084	9166277	g304	UN LOC108230325 [Kryptolebias marmoratus]
9061644	9068160	g306					myosin-6-like, partial [P.reticulata]
9093765	9178168	g307		9192350	9269765	g305	GTPase-activating Rap/Ran-GAP domain-like protein 3 isoform X1 [P.formosa]
9106480	9107909	g308					UN LOC106920688 isoform X2 [P.mexicana]
9184297	9186700	g309		9275920	9278336	g306	prostaglandin E synthase [P.reticulata]
9199935	9211247	g310		9293163	9304523	g307	ubiquitin carboxyl-terminal hydrolase 20 isoform X1 [P.reticulata]
9211581	9216963	g311		9304856	9310244	g308	60S ribosomal protein L7a [Xiphophorus hellerii]
9217843	9219992	g312		9311135	9313277	g309	surfeit locus protein 1-like [P.mexicana]
9220242	9222243	g313		9313527	9315513	g310	surfeit locus protein 6 isoform X1 [P.reticulata]
9223557	9228037	g314		9316827	9321302	g311	kynurenine--oxoglutarate transaminase 1 [P.reticulata]
9228889	9232438	g315		9322212	9325717	g312	putative methyltransferase C9orf114 homolog [P.reticulata]
9235088	9240029	g316		9328420	9333358	g313	alpha-N-acetylgalactosaminide alpha-2,6-sialyltransferase 6-like [P.formosa]
9243067	9251900	g317		9336431	9345171	g314	alpha-N-acetyl-neuraminyl-2,3-beta-galactosyl-1,3-N-acetyl-galactosaminide alpha-2,6-sialyltransferase [P.reticulata]
9254646	9263856	g318		9347921	9357238	g315	mitoguardin-2 [P.reticulata]
9267887	9272078	g319		9361268	9365477	g316	dolichyldiphosphatase 1 [P.reticulata]
9300487	9344423	g320		9394120	9430550	g317	netrin-G2 isoform X1 [Parambassis ranga]
9300487	9392898	g321		9394120	9479164	g318	filaggrin-2-like isoform X1 [P.mexicana]
9379699	9384183	g322		9466254	9470735	g319	netrin-G2-like [P.reticulata]
9496558	9545769	g323		9584984	9634322	g320	rap guanine nucleotide exchange factor 1-like isoform X4 [P.reticulata]
9547914	9549666	g324		9636554	9638306	g321	uridine-cytidine kinase 1 [P.reticulata]
9553168	9554007	g325		9641803	9642642	g322	DNL-type zinc finger protein [P.reticulata]
9563049	9567779	g326		9686805	9691535	g323	volume-regulated anion channel subunit LRRC8A [P.mexicana]
9575331	9579375	g327		9699097	9703140	g324	phytanoyl-CoA dioxygenase domain-containing protein 1 isoform X2 [P.reticulata]
9581253	9582824	g328		9705019	9706590	g325	dolichol kinase [P.reticulata]
9584656	9601722	g329		9708415	9725478	g326	nucleoporin NUP188 homolog [P.reticulata]
9602468	9628684	g330		9726224	9752545	g327	CDK5 regulatory subunit-associated protein 2 [P.reticulata]
9644670	9723650	g331		9768462	9847116	g328	collagen alpha-1(XXVII) chain B-like [P.reticulata]
9763884	9765108	g332		9885906	9887130	g329	putative UDP-GlcNAc:betaGal beta-1,3-N-acetylglucosaminyltransferase LOC100288842 [P.reticulata]
9767889	9771668	g333		9889879	9893666	g330	26S proteasome non-ATPase regulatory subunit 5 [P.reticulata]
9779138	9815234	g334		9899310	9935339	g331	potassium channel subfamily T member 2-like isoform X1 [P.reticulata]
9819242	9830539	g335		9939326	9950625	g332	calmodulin-regulated spectrin-associated protein 1-B-like isoform X2 [P.reticulata]
9841234	9843918	g336		9961213	9963863	g333	UN LOC103473439 isoform X1 [P.reticulata]
9851107	9875215	g337		9969899	9994059	g334	neurogenic locus notch homolog protein 1-like [P.reticulata]
9896940	9913571	g338		10015829	10030830	g335	protein transport protein Sec16A isoform X3 [P.reticulata]
9917282	9919097	g339		10034505	10036310	g336	UN LOC103473443 isoform X1 [P.reticulata]
9920194	9921756	g340		10037407	10038969	g337	60S ribosomal protein L28 [P.mexicana]
9922880	9924212	g341		10040068	10041405	g338	histidine-rich glycoprotein-like [Gadus morhua]
9926503	9947213	g342		10043695	10061175	g339	LOW QUALITY PROTEIN: prostaglandin G/H synthase 1-like [Xiphophorus couchianus]
9949442	9952383	g343		10063402	10066323	g340	60S ribosomal protein L37 [Xiphophorus maculatus]
9955459	9967570	g344		10069390	10081127	g341	alpha-2,8-sialyltransferase 8E isoform X1 [P.reticulata]
9972180	9999172	g345		10085737	10112673	g342	lipoxygenase homology domain-containing protein 1 [P.reticulata]
10005935	10017391	g346		10119416	10130845	g343	RING finger protein 165-like [P.reticulata]
10028245	10035756	g347		10142442	10149948	g344	UN C18orf25 homolog isoform X1 [P.reticulata]
10034836	10035756	g348		10149028	10149948	g345	UN C18orf25 homolog isoform X3 [Xiphophorus maculatus]
10038045	10041848	g349		10149997	10156043	g346	homeodomain-interacting protein kinase 2-like [P.reticulata]
10044061	10049523	g350		10160323	10166831	g347	ATP synthase subunit alpha, mitochondrial isoform X1 [P.reticulata]
10051287	10053564	g351		10168337	10170614	g348	UN LOC103473454 [P.reticulata]
10056304	10059084	g352		10173356	10176138	g349	dnaJ homolog subfamily B member 5-like [P.latipinna]
10065454	10069014	g353		10183161	10186719	g350	urea transporter 1-like isoform X2 [Xiphophorus maculatus]
10072167	10088587	g354		10189916	10206347	g351	thrombospondin-4-B-like isoform X1 [P.reticulata]
10098066	10105739	g355		10215854	10223522	g352	BCL2/adenovirus E1B 19 kDa protein-interacting protein 3-like [P.reticulata]
10124878	10163859	g356		10242696	10280730	g353	proline-rich protein 36-like isoform X1 [P.reticulata]
10175959	10208057	g357		10292830	10324630	g354	proprotein convertase subtilisin/kexin type 5-like [P.latipinna]
10186598	10194787	g358		10303244	10311442	g355	proprotein convertase subtilisin/kexin type 5 [Oreochromis niloticus]
10210239	10218786	g359		10326812	10334981	g356	protein prune homolog 2-like isoform X1 [P.mexicana]
10228459	10231896	g360		10344718	10348161	g357	guanine nucleotide-binding protein subunit alpha-14-like [P.reticulata]
10232941	10237945	g361		10349180	10354198	g358	guanine nucleotide-binding protein subunit alpha-14-like [P.reticulata]
10239538	10247190	g362		10355799	10365166	g359	guanine nucleotide-binding protein subunit alpha-11-like [P.reticulata]
10253000	10264020	g363		10370945	10381975	g360	guanine nucleotide-binding protein G(q) subunit alpha-like [P.reticulata]
10266853	10278406	g364		10384828	10396381	g361	heterogeneous nuclear ribonucleoprotein K-like isoform X2 [P.reticulata]
10284418	10305223	g365		10402326	10423677	g362	BDNF/NT-3 growth factors receptor-like isoform X1 [P.reticulata]
10312950	10321587	g366		10431390	10440007	g363	E3 ubiquitin-protein ligase KCMF1 [P.reticulata]
10324637	10371336	g367		10443058	10489688	g364	integrin alpha-1 isoform X1 [P.reticulata]
10391175	10397048	g368		10507667	10513533	g365	Golgi phosphoprotein 3 [P.reticulata]
10404448	10419137	g369		10528247	10535545	g366	proline-serine-threonine phosphatase-interacting protein 2 [P.reticulata]
10421413	10432558	g370		10537821	10548959	g367	ATP-dependent RNA helicase DHX29 [P.reticulata]
10432770	10448598	g371		10549171	10564926	g368	superkiller viralicidic activity 2-like 2 [P.reticulata]
10449654	10465315	g372		10565982	10581823	g369	phospholipid phosphatase 1 isoform X1 [P.reticulata]
10472889	10496197	g373		10589388	10613087	g370	chondroitin sulfate N-acetylgalactosaminyltransferase 1 [P.reticulata]
10513470	10514732	g374		10630404	10631660	g371	nucleoredoxin-like protein 2 [P.reticulata]
10516031	10516783	g375		10632957	10633711	g372	guanine nucleotide-binding protein G(I)/G(S)/G(O) subunit gamma-10 [Notolabrus celidotus]
10521567	10527856	g376		10638493	10644742	g373	probetacellulin-like isoform X1 [P.reticulata]
10539156	10540391	g377		10657848	10659083	g374	relaxin-3 receptor 1 [P.reticulata]
10547997	10569377	g378		10666650	10686297	g375	membrane-associated transporter protein [P.reticulata] slc45a2
10580489	10602702	g379		10704953	10725638	g376	alpha-methylacyl-CoA racemase [P.reticulata]
10639957	10661946	g380		10771705	10805886	g377	lysosome membrane protein 2-like isoform X1 [P.reticulata]
10665033	10671842	g381		10808981	10815777	g378	nucleoporin p54 isoform X1 [P.reticulata]
10673522	10681043	g382		10817467	10826381	g379	serine/threonine-protein phosphatase with EF-hands 2 isoform X3 [P.formosa]
10690326	10691819	g383		10835845	10837339	g380	growth/differentiation factor 7-like isoform X1 [P.reticulata]
10699171	10713295	g384		10844662	10858853	g381	AF4/FMR2 family member 1 isoform X2 [P.reticulata]
10716071	10735023	g385		10861634	10880546	g382	macrophage mannose receptor 1-like [P.reticulata]
10718068	10727713	g386		10863613	10873244	g383	macrophage mannose receptor 1-like [P.reticulata]
10720691	10722143	g387		10866236	10867703	g384	macrophage mannose receptor 1-like [P.reticulata]
10737924	10742810	g388		10883457	10888347	g385	kelch-like protein 8 [P.reticulata]
10746144	10751499	g389		10891691	10897157	g386	protein SDA1 homolog [P.reticulata]
10756235	10798339	g390		10901877	10943867	g387	tyrosine-protein phosphatase non-receptor type 13 isoform X1 [P.reticulata]
10807117	10843928	g391		10952934	10989864	g388	mitogen-activated protein kinase 10 isoform 1x [Danio rerio]
10851053	10913301	g392		10997073	11057976	g389	rho GTPase-activating protein 24 isoform X1 [P.reticulata]
				11066605	11068349	g390	-
10929120	10930078	g393		11073708	11074649	g391	endothelial cell-specific molecule 1 [P.reticulata]
10935937	10980128	g394		11080516	11124676	g392	probable E3 ubiquitin-protein ligase HERC1 isoform X1 [P.reticulata]
11007592	11133783	g395		11152106	11225045	g393	potassium/sodium hyperpolarization-activated cyclic nucleotide-gated channel 1-like [P.reticulata]
11162382	11198072	g396		11253717	11291103	g394	collagen and calcium-binding EGF domain-containing protein 1 isoform X1 [P.reticulata]
11208419	11218183	g397		11303205	11319606	g395	protein ERGIC-53 [P.reticulata]
11220923	11226138	g398		11322228	11327465	g396	complexin-4 [P.reticulata]
11229736	11231771	g399		11331067	11333063	g397	retinal homeobox protein Rx isoform X1 [P.reticulata]
11233766	11234725	g400		11335055	11336022	g398	gastrin-releasing peptide [P.reticulata]
11245294	11252816	g401		11346878	11354455	g399	zinc finger protein 532 [P.reticulata]
11257778	11262499	g402		11360642	11365364	g400	nose resistant to fluoxetine protein 6-like [P.reticulata]
11268090	11277630	g403		11370839	11380059	g401	alpha-protein kinase 2 [P.reticulata]
				11381361	11382178	g402	-
11285728	11315753	g404		11388179	11418324	g403	E3 ubiquitin-protein ligase NEDD4-like isoform X3 [P.reticulata]
11331555	11341444	g405		11434181	11444055	g404	dnaJ homolog subfamily C member 21 isoform X4 [P.reticulata]
11363959	11376296	g406		11466338	11475036	g405	alanine--glyoxylate aminotransferase 2, mitochondrial [P.reticulata]
				11512148	11524418	g406	alanine--glyoxylate aminotransferase 2, mitochondrial [P.reticulata]
11378039	11389286	g407		11526159	11537363	g407	prolactin receptor [P.reticulata]
11406103	11407298	g408		11558733	11562614	g408	ribosome biogenesis protein BRX1 homolog [P.reticulata]
11408021	11409894	g409		11563337	11565211	g409	cell cycle checkpoint protein RAD1 [P.reticulata]
11412524	11412862	g410		11567839	11568177	g410	UPF0729 protein C18orf32 homolog [P.reticulata]
11418030	11465731	g411		11573345	11620974	g411	dymeclin isoform X2 [P.reticulata]
11475554	11494921	g412		11629447	11648823	g412	mothers against decapentaplegic homolog 7 [P.mexicana]
11549949	11586367	g413		11709956	11746384	g413	CBP80/20-dependent translation initiation factor isoform X1 [P.reticulata]
11673413	11676303	g414		11832672	11835562	g414	zinc finger and BTB domain-containing protein 7C [P.reticulata]
11673413	11676303	g415		11832672	11835562	g415	zinc finger and BTB domain-containing protein 7C [P.reticulata]
11734181	11748192	g416					SHC-transforming protein 3 [P.reticulata]
				11847468	11854323	g416	sphingosine 1-phosphate receptor 3-like isoform X1 [P.mexicana]
				11864263	11865336	g417	sphingosine 1-phosphate receptor 3 [P.formosa]
11765064	11765365	g417		11910333	11911503	g418	cyclin-dependent kinases regulatory subunit-like [P.formosa]
				11919841	11924423	g419	semaphorin-4D isoform X1 [P.reticulata]
11819500	11838843	g418		11966067	11983849	g420	alpha-adducin isoform X2 [P.reticulata]
11842334	11852606	g419		11987335	11997632	g421	nucleolar protein 14 [P.reticulata]
11856378	11866552	g420		12001341	12011552	g422	alpha-synuclein-like [P.reticulata]
11940561	11943185	g421		12085802	12088418	g423	Krueppel-like factor 4 [P.reticulata]
11946008	11952374	g422		12091241	12097613	g424	UV excision repair protein RAD23 homolog B [P.reticulata]
11959188	11979431	g423		12104436	12124655	g425	zinc finger protein 462 isoform X2 [P.reticulata]
12034049	12035000	g424					-
12069805	12084166	g425		12215246	12229573	g426	trimeric intracellular cation channel type B [P.reticulata]
12136217	12153408	g426		12271793	12288852	g427	tyrosine-protein kinase SgK223 isoform X1 [P.reticulata]
12158540	12160683	g427		12294051	12296188	g428	endothelial differentiation-related factor 1 [Xiphophorus maculatus]
12162165	12163832	g428		12297666	12299332	g429	UN LOC100692291 [Oreochromis niloticus]
12166901	12184086	g429		12302405	12319570	g430	protein PRRC2B isoform X1 [P.reticulata]
12194644	12199795	g430		12329057	12336033	g431	probable lipid phosphate phosphatase PPAPDC3 [P.latipinna]
12204915	12214118	g431		12341060	12350386	g432	protein FAM78A isoform X1 [P.reticulata]
12227524	12262093	g432		12363735	12398183	g433	nuclear pore complex protein Nup214 isoform X4 [P.reticulata]
12269162	12277197	g433		12405258	12413297	g434	nucleus accumbens-associated protein 2 isoform X1 [P.reticulata]
12306932	12307351	g434		12442953	12443372	g435	protein C9orf69 homolog [P.latipinna]
12340944	12347330	g435		12482870	12489257	g436	LIM/homeobox protein Lhx3 isoform X3 [P.reticulata]
12353501	12446618	g436					#VALUE!
12378803	12395657	g437		12515348	12532209	g437	G-protein-signaling modulator 1 isoform X1 [P.reticulata]
12398929	12404907	g438		12539897	12551530	g438	adenylate kinase isoenzyme 1 [P.reticulata]
				12551588	12586080	g439	transforming growth factor beta receptor type 3-like [P.reticulata]
12413938	12415192	g439		12652194	12653410	g440	UN LOC106912038, partial [P.mexicana]
12476256	12568019	g440		12768646	12860577	g441	BMP/retinoic acid-inducible neural-specific protein 1 [P.reticulata]
12652845	12653650	g441		12942639	12943444	g442	UN LOC108166957 [P.reticulata]
12668245	12668853	g442		12958033	12958641	g443	myosin light chain 4-like [P.reticulata]
				12999379	13000968	g444	UN LOC109200242 [Oreochromis niloticus]
				13002898	13004814	g445	UN LOC103132508 [P.formosa]
				13006876	13008465	g446	UN LOC109200242 [Oreochromis niloticus]
12739403	13011689	g443		13041080	13336294	g447	astrotactin-2 isoform X1 [P.reticulata]
				13070951	13071386	g448	-
12957079	12959118	g444		13283187	13285226	g449	E3 ubiquitin-protein ligase TRIM32 isoform X1 [P.reticulata]
13024551	13117294	g445		13356803	13448495	g450	pappalysin-1 isoform X2 [P.reticulata]
13138071	13165417	g446		13469358	13496548	g451	zinc finger protein 618 isoform X1 [P.mexicana]
13211898	13454588	g447		13542661	13677220	g452	regulator of G-protein signaling 3 isoform X1 [P.reticulata]
13459872	13462248	g448		13678493	13680872	g453	rab9 effector protein with kelch motifs [P.reticulata]
13463010	13464973	g449		13681632	13683595	g454	78 kDa glucose-regulated protein [Fundulus heteroclitus]
13463010	13465633	g450		13681632	13684255	g455	78 kDa glucose-regulated protein [P.reticulata]
13470060	13485730	g451		13688686	13704541	g456	golgin subfamily A member 2 isoform X1 [P.mexicana]
13489279	13537993	g452		13708066	13757058	g457	dynamin-1 isoform X1 [P.reticulata]
13539301	13545244	g453		13758365	13764315	g458	cip1-interacting zinc finger protein [P.reticulata]
13550402	13551073	g454		13767232	13767903	g459	UPF0184 protein C9orf16 homolog [P.reticulata]
13552396	13554616	g455		13769215	13771436	g460	surfeit locus protein 2 [P.reticulata]
13556261	13562664	g456		13773079	13779475	g461	surfeit locus protein 4 [P.mexicana]
13567446	13596839	g457		13784244	13813418	g462	argininosuccinate synthase [P.reticulata]
13612438	13638075	g458		13828751	13854362	g463	far upstream element-binding protein 3-like isoform X1 [Xiphophorus maculatus]
13621349	13621569	g459					zinc finger BED domain-containing protein 1-like [P.mexicana]
13644723	13648110	g460		13861103	13864481	g464	PR domain zinc finger protein 12 [P.reticulata]
13653989	13658660	g461		13870086	13874757	g465	F-box/WD repeat-containing protein 5 [P.reticulata]
13664957	13672002	g462		13881080	13888107	g466	TNF receptor-associated factor 2-like isoform X1 [P.reticulata]
13677607	13682760	g463		13893528	13898660	g467	ubiquinone biosynthesis protein COQ4 homolog, mitochondrial [P.reticulata]
13688003	13699968	g464		13903808	13911312	g468	B box and SPRY domain-containing protein [P.reticulata]
				13903808	13911441	g469	B box and SPRY domain-containing protein [P.reticulata]
13705057	13709224	g465		13916472	13920635	g470	zinc finger MYND domain-containing protein 19 [Paralichthys olivaceus]
13714700	13716324	g466		13926070	13927691	g471	transmembrane protein 141 [P.reticulata]
13720063	13722278	g467		13931439	13933653	g472	microfibril-associated glycoprotein 4-like isoform X1 [P.reticulata]
13723703	13736403	g468		13935078	13947750	g473	suppressor APC domain-containing protein 2 [P.reticulata]
13743051	13744091	g469		13954389	13955429	g474	proteinase-activated receptor 3-like [P.reticulata]
13747278	13750104	g470		13958616	13961446	g475	zinc finger protein 2 homolog [P.reticulata]
13754336	13764459	g471		13965655	13975713	g476	PH and SEC7 domain-containing protein 2-like [P.reticulata]
13773188	13792215	g472		13984433	13996627	g477	paired box protein Pax-8 isoform X4 [P.reticulata]
13805899	13808971	g473		14016056	14020201	g478	ADP-ribosylation factor-like protein 3 isoform X2 [Xiphophorus maculatus]
13810595	13815610	g474		14021825	14026860	g479	WW domain-binding protein 1-like [P.reticulata]
13824811	13829318	g475		14035999	14040511	g480	VIP36-like protein isoform X1 [P.reticulata]
13830160	13834983	g476		14042196	14046184	g481	mitochondrial fission process protein 1 [Xiphophorus maculatus]
13839996	13840562	g477		14051199	14051764	g482	UN LOC101161254 [Oryzias latipes]
13856918	13953152	g478		14067504	14165031	g483	mediator of RNA polymerase II transcription subunit 13-like isoform X1 [P.reticulata]
14163249	14170679	g479		14375717	14383111	g484	T-box transcription factor TBX3 isoform X1 [P.reticulata]
14199838	14216565	g480		14405817	14422529	g485	T-box transcription factor TBX5-A-like isoform X1 [P.reticulata]
14253098	14261673	g481		14459372	14467924	g486	ATP-dependent RNA helicase DDX54 [P.reticulata]
14265448	14276686	g482		14469833	14482933	g487	UN LOC117539177 [Gymnodraco acuticeps]
14284637	14290185	g483		14490984	14496522	g488	ras-related protein Rab-14-like [Amphiprion ocellaris]
14294811	14324455	g484		14501134	14530729	g489	tyrosine-protein kinase ABL1 isoform X1 [P.reticulata]
14329024	14331900	g485		14535304	14538184	g490	exosome complex component RRP4 [P.reticulata]
14333137	14360897	g486		14539405	14567059	g491	RAB6A-GEF complex partner protein 1 isoform X1 [P.reticulata]
14366978	14381419	g487		14574980	14589352	g492	endoplasmic reticulum metallopeptidase 1 [P.reticulata]
14384169	14386344	g488		14592188	14594364	g493	LOW QUALITY PROTEIN: ornithine decarboxylase antizyme 2-like [P.reticulata]
14392130	14420639	g489		14600050	14628802	g494	E3 ubiquitin-protein ligase UHRF2 [P.reticulata]
14424124	14433889	g490		14632316	14642118	g495	UN KIAA2026 homolog [P.reticulata]
14434712	14437367	g491		14642940	14645105	g496	melanoma antigen recognized by T-cells 1 [P.reticulata]
14442538	14472629	g492		14650283	14680231	g497	nipped-B-like protein B isoform X1 [P.reticulata]
14478823	14492947	g493		14686449	14700535	g498	nuclear pore complex protein Nup155 [P.reticulata]
14494666	14495763	g494		14702258	14703355	g499	rhodopsin, long-wavelength-like [P.reticulata]
14496598	14507677	g495		14704217	14714859	g500	palmitoyltransferase ZDHHC5-like [P.reticulata]
14520751	14540052	g496		14728379	14747580	g501	armadillo repeat protein deleted in velo-cardio-facial syndrome homolog isoform X2 [P.reticulata]
14547606	14549243	g497		14756021	14757658	g502	bone morphogenetic protein 10-like [P.reticulata]
14554204	14562976	g498		14762621	14771406	g503	mothers against decapentaplegic homolog 4-like isoform X2 [P.reticulata]
14570216	14578965	g499		14778657	14787254	g504	transcription factor RFX3 isoform X1 [P.reticulata]
14590407	14605149	g500		14798715	14813357	g505	zinc finger protein GLIS3 isoform X1 [P.reticulata]
14674861	14815401	g501		14882923	15023580	g506	netrin receptor UNC5C-like isoform X1 [P.reticulata]
14818994	14836655	g502		15027170	15044171	g507	bone morphogenetic protein receptor type-1B-like [P.reticulata]
14872804	14906669	g503		15080038	15114375	g508	PDZ and LIM domain protein 5-like isoform X1 [P.reticulata]
14918283	14923736	g504		15126225	15131623	g509	melanopsin-B-like isoform X2 [P.reticulata]
14954230	14961609	g505		15162947	15170331	g510	glial cell line-derived neurotrophic factor isoform X1 [P.reticulata]
14955762	14961609	g506		15164453	15170331	g511	glial cell line-derived neurotrophic factor isoform X1 [P.reticulata]
14969998	15009730	g507		15178692	15218195	g512	WD repeat-containing protein 70 isoform X1 [P.reticulata]
15010627	15031261	g508		15219095	15239641	g513	UN C5orf42 homolog isoform X2 [P.reticulata]
15046002	15060792	g509		15254374	15269159	g514	protein FAM222A-like isoform X1 [P.reticulata]
15063643	15067708	g510		15271996	15275967	g515	glycolipid transfer protein-like [P.reticulata]
15071116	15083512	g511		15278995	15291414	g516	ARF GTPase-activating protein GIT2-like isoform X3 [P.reticulata]
15086430	15099484	g512		15293892	15306977	g517	small G protein signaling modulator 1-like isoform X1 [P.reticulata]
15102577	15108456	g513		15310066	15313894	g518	serine/arginine-rich splicing factor 9-like [P.reticulata]
15109372	15117438	g514		15317130	15325225	g519	proline dehydrogenase 1, mitochondrial-like [P.reticulata]
15124927	15128167	g515		15333003	15336485	g520	galactosylceramide sulfotransferase-like isoform X1 [P.reticulata]
15130411	15130757	g516		15339080	15339426	g521	cytochrome b-c1 complex subunit 9 [P.mexicana]
15131701	15133256	g517		15340373	15341924	g522	zinc finger matrin-type protein 5 [P.reticulata]
15137560	15153956	g518		15346259	15362633	g523	calcium-binding protein 7 [Fundulus heteroclitus]
15218253	15221599	g519		15416115	15419391	g524	calcineurin B homologous protein 3-like [P.reticulata]
15226280	15227438	g520		15424071	15425228	g525	UN LOC103473748 [P.reticulata]
15232746	15237710	g521		15430521	15435351	g526	serine/threonine-protein kinase TAO3-like [Xiphophorus couchianus]
15243208	15244351	g522		15440859	15442000	g527	heat shock protein beta-1-like [P.reticulata]
15246908	15254264	g523		15444579	15451919	g528	sushi domain-containing protein 2 [P.reticulata]
15256404	15269419	g524		15454077	15467996	g529	unconventional myosin-Ih-like isoform X1 [P.reticulata]
15272252	15277173	g525		15470804	15475709	g530	synaptic vesicle 2-related protein-like [P.reticulata]
15278620	15291515	g526		15477146	15490039	g531	protein phosphatase Slingshot homolog 1-like isoform X2 [P.reticulata]
15300740	15316017	g527		15499258	15514557	g532	UN LOC103148988 isoform X1 [P.formosa]
15320169	15321671	g528		15518709	15520211	g533	mucin-5AC [P.reticulata]
15328624	15329481	g529		15527165	15528022	g534	transmembrane protein 119 isoform X1 [P.reticulata]
15330960	15333688	g530		15529499	15532228	g535	iron-sulfur cluster assembly scaffold protein IscU-like [Xiphophorus hellerii]
15336643	15337656	g531		15535367	15536380	g536	chemokine-like receptor 1 [P.reticulata]
15339356	15341614	g532		15538081	15540331	g537	E3 ubiquitin-protein ligase RNF185 [P.reticulata]
15343290	15345753	g533		15541921	15544345	g538	transcription factor Adf-1-like [P.reticulata]
15348245	15349632	g534		15546835	15548222	g539	homeobox protein goosecoid-2 [P.reticulata]
15350894	15355323	g535		15549487	15553905	g540	protein DGCR14 [P.reticulata]
15358000	15369948	g536		15556574	15568521	g541	integral membrane protein DGCR2/IDD isoform X2 [P.reticulata]
15374397	15377534	g537		15572970	15576041	g542	carbonic anhydrase 15-like [P.reticulata]
15381661	15395433	g538		15580517	15594326	g543	histone-lysine N-methyltransferase SETD1B isoform X1 [P.reticulata]
15401319	15403605	g539		15600199	15602483	g544	rho-related GTP-binding protein RhoF [P.reticulata]
15405720	15414802	g540		15604600	15610945	g545	transmembrane protein 120B-like [P.mexicana]
15416348	15417939	g541		15615235	15616825	g546	MORN repeat-containing protein 3 [P.reticulata]
15419541	15420295	g542		15618425	15619179	g547	calcium release-activated calcium channel protein 1 [P.mexicana]
15422119	15440965	g543		15621003	15639785	g548	lysine-specific demethylase 2B isoform X1 [P.reticulata]
15444995	15472245	g544		15643813	15655147	g549	E3 ubiquitin-protein ligase RNF34 isoform X1 [P.reticulata]
15444995	15454870	g545		15643813	15653143	g550	E3 ubiquitin-protein ligase RNF34-like isoform X3 [Xiphophorus maculatus]
				15648027	15653212	g551	E3 ubiquitin-protein ligase RNF34-like isoform X3 [Xiphophorus maculatus]
15485828	15518033	g546		15678756	15715547	g552	leucine-rich repeat-containing protein 75B-like [P.reticulata]
15530693	15538996	g547		15728780	15737069	g553	gamma-glutamyltranspeptidase 1-like [P.reticulata]
15544239	15553016	g548		15742828	15751613	g554	gamma-glutamyltransferase 5-like [P.reticulata]
15571304	15589188	g549		15770094	15787994	g555	UN LOC106925514 isoform X1 [P.mexicana]
15591564	15597647	g550		15790374	15796473	g556	glycerol-3-phosphate acyltransferase 4-like isoform X1 [P.reticulata]
15599538	15614004	g551		15798350	15812807	g557	rab11 family-interacting protein 1 [P.reticulata]
15615410	15619154	g552		15814208	15817971	g558	transcription factor IIIB 50 kDa subunit [P.reticulata]
15617241	15619154	g553		15816072	15817971	g559	transcription factor IIIB 50 kDa subunit [P.reticulata]
15625296	15628168	g554		15824118	15826987	g560	prolactin-releasing peptide receptor-like [P.reticulata]
15637443	15638720	g555					UN LOC116716708 [Xiphophorus hellerii]
15640412	15643757	g556					UN LOC114147606 [Xiphophorus couchianus]
15655497	15670383	g557		15846802	15858916	g561	annexin A4 isoform X1 [Xiphophorus couchianus]
15672349	15696721	g558		15863662	15888081	g562	AP2-associated protein kinase 1-like isoform X1 [P.reticulata]
15704074	15721288	g559		15895444	15913606	g563	anthrax toxin receptor 1-like [P.mexicana]
15722473	15739153	g560		15914797	15930851	g564	bone morphogenetic protein 1-like isoform X2 [P.reticulata]
15733587	15737977	g561		15925401	15929779	g565	bone morphogenetic protein 1-like isoform X4 [P.reticulata]
15733587	15738082	g562		15925407	15929698	g566	bone morphogenetic protein 1-like isoform X4 [P.reticulata]
				15925407	15929779	g567	bone morphogenetic protein 1-like isoform X4 [P.reticulata]
15741601	15745649	g563		15934659	15938703	g568	zinc-binding protein A33-like [P.reticulata]
15751354	15762606	g564		15944483	15955797	g569	calsenilin-like isoform X2 [P.reticulata]
15764674	15765120	g565		15957811	15958257	g570	period circadian protein-like [Fundulus heteroclitus]
15768798	15770333	g566		15961910	15963550	g571	glycine-rich cell wall structural protein 1.8-like [P.mexicana]
15779842	15785203	g567		15968429	15973779	g572	protein phosphatase PTC7 homolog [P.mexicana]
15789201	15803611	g568		15977783	15985354	g573	TBC1 domain family member 10A [P.reticulata]
15814640	15815710	g569		16003177	16004247	g574	apelin receptor B-like [P.reticulata]
15828144	15832058	g570		16016693	16020602	g575	NF-kappa-B inhibitor-like protein 1 isoform X2 [P.reticulata]
15834039	15845106	g571		16022627	16033704	g576	V-type proton ATPase 116 kDa subunit a-like [P.reticulata]
15842802	15871998	g572		16037166	16053065	g577	oxysterol-binding protein 2-like isoform X1 [P.reticulata]
15848569	15864437	g573		16060432	16066730	g578	solute carrier family 35 member E4 isoform X1 [P.reticulata]
15871309	15877588	g574		16060543	16061121	g579	solute carrier family 35 member E4 isoform X1 [P.reticulata]
15881391	15883522	g575		16070538	16072669	g580	smoothelin-like [P.reticulata]
15888076	15896185	g576		16077210	16085225	g581	inositol polyphosphate 5-phosphatase K-like [P.reticulata]
15897403	15905408	g577		16086443	16094457	g582	S-adenosylmethionine synthase isoform type-2-like [P.mexicana]
15907804	15911794	g578		16096867	16100847	g583	pulmonary surfactant-associated protein B [P.reticulata]
15921240	15926904	g579		16111015	16116480	g584	eosinophil peroxidase-like [P.formosa]
15931117	15935850	g580		16120567	16125290	g585	eosinophil peroxidase-like [P.mexicana]
15945898	15951753	g581		16135300	16141143	g586	protein-lysine 6-oxidase-like isoform X1 [P.reticulata]
15953062	15957698	g582		16142456	16147104	g587	sorting nexin-24 [P.reticulata]
15960239	15967891	g583		16149651	16157300	g588	vitamin K-dependent gamma-carboxylase [P.reticulata]
15970193	15974213	g584		16159624	16163638	g589	germ cell-less protein-like 1 isoform X1 [P.reticulata]
15977130	15979213	g585		16166554	16168636	g590	protein FAM136A [P.reticulata]
15980567	15985391	g586		16169990	16174456	g591	prenylcysteine oxidase 1 [P.reticulata]
15987639	15990812	g587		16177096	16180280	g592	tripartite motif-containing protein 44-like isoform X1 [P.reticulata]
15992097	16001541	g588		16181572	16190033	g593	sodium-dependent phosphate transporter 1-B-like [P.reticulata]
16018943	16023420	g589		16207320	16211780	g594	stAR-related lipid transfer protein 7, mitochondrial isoform X1 [P.reticulata]
16031113	16036833	g590		16219484	16225219	g595	developmentally-regulated GTP-binding protein 1 [P.reticulata]
16043152	16076884	g591		16231194	16265511	g596	small conductance calcium-activated potassium channel protein 2-like isoform X1 [P.mexicana]
16089523	16093703	g592		16278101	16282302	g597	solute carrier family 2, facilitated glucose transporter member 9-like [P.reticulata]
16096786	16104428	g593		16285276	16292994	g598	cytosolic purine 5'-nucleotidase-like isoform X1 [P.mexicana]
16125324	16151690	g594		16313948	16338717	g599	signal peptide peptidase-like 3 [P.reticulata]
16186255	16286821	g595		16373299	16473233	g600	UN LOC111610315 isoform X1 [Xiphophorus maculatus]
16189577	16202411	g596		16376625	16389457	g601	guanine nucleotide-binding protein G(z) subunit alpha [Xiphophorus maculatus]
16234653	16238754	g597		16421585	16425634	g602	sodium/glucose cotransporter 1-like [P.latipinna]
16263691	16388439	g598		16450561	16584800	g603	sodium/glucose cotransporter 1-like [P.latipinna]
16288765	16316438	g599					sodium/glucose cotransporter 1-like isoform X1 [P.reticulata]
16337201	16337977	g600		16525717	16526493	g604	RING finger protein 208 [P.reticulata]
16339986	16344607	g601		16528502	16533123	g605	serine/threonine-protein kinase phg2-like isoform X1 [P.reticulata]
16347249	16353480	g602		16535782	16542021	g606	protein FAM166B [P.reticulata]
16354647	16361392	g603		16543093	16549863	g607	iporin-like [P.reticulata]
16368556	16369216	g604		16564608	16565268	g608	liver-expressed antimicrobial peptide 2-like [P.mexicana]
16372630	16381653	g605		16568687	16577848	g609	lysosome membrane protein 2-like [P.reticulata]
16386092	16434582	g606		16582361	16616092	g610	ankycorbin isoform X1 [P.reticulata]
16392998	16400773	g607					-
16479606	16501154	g608		16661135	16683469	g611	fibroblast growth factor 10-like [P.reticulata]
16539255	16564894	g609		16728728	16754329	g612	NAD(P) transhydrogenase, mitochondrial [P.reticulata]
16570895	16578615	g610		16760393	16776901	g613	coiled-coil domain-containing protein 80-like [P.reticulata]
16583497	16599432	g611		16787222	16796996	g614	FYN-binding protein isoform X1 [P.reticulata]
16601615	16603227	g612		16799252	16800864	g615	ATP synthase subunit e, mitochondrial [Cyprinodon variegatus]
16605485	16614499	g613		16803134	16812157	g616	rod cGMP-specific 3',5'-cyclic phosphodiesterase subunit beta-like [P.reticulata]
16619367	16620506	g614		16817074	16818213	g617	purpurin-like [P.reticulata]
16625419	16635638	g615		16823128	16833356	g618	keratin, type I cytoskeletal 18-A-like [P.reticulata]
16671548	16676409	g616		16869111	16873961	g619	NADH dehydrogenase [ubiquinone] 1 alpha subcomplex subunit 8 [P.reticulata]
16676918	16688722	g617		16874470	16886291	g620	LOW QUALITY PROTEIN: MORN repeat-containing protein 5 [P.reticulata]
16690942	16702836	g618		16888437	16900332	g621	LIM/homeobox protein Lhx6 isoform X1 [P.reticulata]
16705548	16716746	g619		16903045	16914058	g622	probable RNA-binding protein 18 isoform X1 [Xiphophorus maculatus]
16722541	16734787	g620		16919861	16932080	g623	ribosome-recycling factor, mitochondrial [P.reticulata]
16750075	16758496	g621		16947385	16955035	g624	programmed cell death 1 ligand 1 isoform X1 [P.reticulata]
16762454	16773364	g622		16958987	16969703	g625	plasminogen receptor (KT) [P.reticulata]
16774559	16775353	g623		16970898	16971694	g626	relaxin-3-like [P.reticulata]
16778456	16798090	g624		16974810	16994377	g627	tyrosine-protein kinase JAK2 [P.reticulata]
16814899	16816833	g625		17011111	17013046	g628	zinc finger and BTB domain-containing protein 26 isoform X2 [P.reticulata]
				17011111	17013046	g629	zinc finger and BTB domain-containing protein 26 isoform X1 [P.reticulata]
16830685	16845945	g626		17026682	17041935	g630	roquin-2 isoform X1 [P.reticulata]
16861386	16925596	g627		17058126	17122475	g631	rab GTPase-activating protein 1 isoform X1 [P.reticulata]
16882011	16883237	g628		17078805	17080031	g632	probable G-protein coupled receptor 21 [P.reticulata]
16944042	16969908	g629		17141182	17167148	g633	spermatid perinuclear RNA-binding protein isoform X1 [P.reticulata]
17101637	17159926	g630		17256736	17318774	g634	SH2 domain-containing protein 3C-like isoform X1 [P.reticulata]
17167244	17175461	g631		17326087	17334121	g635	ubiquitin-related modifier 1 [Xiphophorus maculatus]
17192346	17202671	g632		17351082	17361451	g636	probable inactive glycosyltransferase 25 family member 3 [Xiphophorus maculatus]
17208323	17233647	g633		17367163	17390685	g637	sarcosine dehydrogenase, mitochondrial [P.reticulata]
17236233	17256887	g634		17393296	17404897	g638	dopamine beta-hydroxylase isoform X1 [P.reticulata]
17281006	17283494	g635		17427820	17430312	g639	protein FAM163B-like [Xiphophorus maculatus]
17287777	17297576	g636		17440366	17445724	g640	DNA repair protein SWI5 homolog [Cyprinodon variegatus]
17292195	17317745	g637		17440366	17465979	g641	long-chain fatty acid transport protein 4 isoform X1 [P.reticulata]
17323154	17325974	g638		17471458	17474255	g642	neutrophil gelatinase-associated lipocalin [P.reticulata]
17328151	17330980	g639		17476425	17479254	g643	protein AMBP-like [P.reticulata]
17333276	17337753	g640		17481549	17485833	g644	protein AMBP [P.reticulata]
17358723	17359061	g641		17506543	17506908	g645	notch-regulated ankyrin repeat-containing protein [Paralichthys olivaceus]
17367598	17410358	g642		17515514	17558573	g646	exonuclease mut-7 homolog isoform X2 [P.reticulata]
17413497	17419204	g643		17561709	17567409	g647	hsp90 co-chaperone Cdc37-like 1 [P.reticulata]
17422586	17430759	g644		17570787	17578941	g648	GTP:AMP phosphotransferase AK3, mitochondrial [P.latipinna]
17433124	17441277	g645		17581326	17589560	g649	RNA 3'-terminal phosphate cyclase-like protein [P.reticulata]
17441633	17445278	g646		17589909	17593544	g650	annexin A3-like [P.reticulata]
17447849	17456861	g647		17596115	17605041	g651	ER degradation-enhancing alpha-mannosidase-like protein 3 isoform X1 [P.reticulata]
17461847	17481655	g648		17610023	17634562	g652	neural proliferation differentiation and control protein 1-like [P.reticulata]
17488821	17490950	g649		17641721	17643850	g653	POU domain, class 5, transcription factor 1-like [P.reticulata]
17495143	17505932	g650		17648029	17658818	g654	alpha-(1,3)-fucosyltransferase 7-like isoform X1 [P.formosa]
17502876	17545692	g651					alpha-(1,3)-fucosyltransferase 7-like [Xiphophorus hellerii]
17513710	17516432	g652		17666578	17669337	g655	chloride intracellular channel protein 4-like [P.reticulata]
17518486	17541386	g653		17671390	17695095	g656	patatin-like phospholipase domain-containing protein 7 isoform X1 [P.reticulata]
17577106	17614392	g654		17735453	17772423	g657	NMDA receptor synaptonuclear signaling and neuronal migration factor isoform X1 [P.reticulata]
17624152	17632687	g655		17782147	17790607	g658	calcium/calmodulin-dependent protein kinase kinase 2 [P.reticulata]
17638296	17640362	g656		17796227	17798220	g659	small nuclear ribonucleoprotein Sm D3 [Paralichthys olivaceus]
17644927	17649499	g657		17802781	17807977	g660	adenosine receptor A2a-like [P.reticulata]
17663357	17733709	g658		17821849	17892381	g661	breakpoint cluster region protein-like [P.reticulata]
17739357	17762891	g659		17898052	17921610	g662	sarcoplasmic/endoplasmic reticulum calcium ATPase 2 isoform X1 [P.mexicana]
17767959	17770346	g660		17926592	17929163	g663	UN LOC106925084 [P.mexicana]
17770563	17772909	g661		17929210	17931555	g664	tRNA pseudouridine synthase A, mitochondrial [P.reticulata]
17774145	17779688	g662		17932791	17938336	g665	nucleolar complex protein 4 homolog [P.reticulata]
17783331	17847126	g663		17942006	18006179	g666	RIMS-binding protein 2-like isoform X12 [P.reticulata]
17859575	17888377	g664		18018622	18047161	g667	transmembrane protein 132D-like [P.reticulata]
				18049897	18050275	g668	-
17916480	17917188	g665		18065239	18065947	g669	UN LOC103461305 [P.reticulata]
17931685	17934459	g666					UN LOC116735495 isoform X3 [Xiphophorus hellerii]
17965961	18126294	g667		18095259	18255422	g670	transmembrane protein 132C-like [P.reticulata]
17974989	17979497	g668		18104255	18108762	g671	transmembrane protein 132C-like [P.reticulata]
18172287	18176837	g669		18301930	18306563	g672	actin-related protein 2/3 complex subunit 3 [P.mexicana]
18177623	18180224	g670		18307345	18309936	g673	GPN-loop GTPase 3 [P.reticulata]
18181583	18184193	g671		18311295	18317835	g674	E3 ubiquitin-protein ligase RNF170-like [P.reticulata]
				18314513	18315105	g675	UN LOC103460807 [P.reticulata]
18187633	18204721	g672		18321290	18338196	g676	protein Hook homolog 3 isoform X1 [P.reticulata]
18226604	18279587	g673		18358147	18408665	g677	metalloprotease TIKI1 [P.reticulata]
18380096	18433385	g674		18503462	18558830	g678	splicing factor, suppressor of white-apricot homolog isoform X1 [P.reticulata]
18498182	18603622	g675		18623474	18724028	g679	matrix metalloproteinase-17 [P.reticulata] XP_007565824.1 P.form
18616469	18635324	g676		18736869	18755685	g680	serine/threonine-protein kinase ULK1 isoform X1 [P.reticulata]
18639320	18643039	g677		18759681	18763413	g681	coiled-coil domain-containing protein 74B-like isoform X1 [P.reticulata]
18648726	18656254	g678		18769430	18776951	g682	crk-like protein [P.formosa]
18663244	18666839	g679		18783932	18787521	g683	T-box-containing protein TBX6L-like [P.reticulata]
18676843	18755646	g680		18801197	18879973	g684	matrix metalloproteinase-17-like [P.latipinna]
				18992126	18993610	g685	UN LOC103482109 [P.reticulata]
18884258	18896175	g681		19017384	19029298	g686	putative helicase mov-10-B.1 isoform X1 [P.reticulata]
18897528	18901862	g682		19029517	19035048	g687	syntaxin-2-like isoform X1 [P.reticulata]
18904141	18905739	g683		19037658	19039294	g688	phosphoglycerate mutase 2 [P.reticulata]
18910940	18913999	g684		19044965	19048029	g689	neurofilament light polypeptide-like [P.reticulata]
18919107	18922631	g685		19053104	19056661	g690	neurofilament medium polypeptide [P.reticulata]
18945132	19017737	g686		19079547	19150295	g691	ankyrin-1-like isoform X2 [P.reticulata]
19023289	19025978	g687		19155865	19158529	g692	eukaryotic translation initiation factor 4E-binding protein 3-like [P.reticulata]
19028752	19030185	g688		19161312	19162655	g693	nodal homolog 2-A-like [P.reticulata]
19037939	19061542	g689		19170155	19193763	g694	low-density lipoprotein receptor-related protein 2-like isoform X1 [P.reticulata]
19074306	19075166	g690		19206442	19207302	g695	claudin-23-like [P.reticulata]
19079347	19158688	g691		19211502	19285348	g696	tankyrase-1-like [P.reticulata]
19166069	19171991	g692		19292648	19298575	g697	dual specificity protein phosphatase 4 [P.reticulata]
				19292843	19295198	g698	dual specificity protein phosphatase 4-like [Xiphophorus maculatus]
19188896	19206838	g693		19315484	19337811	g699	putative cytochrome P450 120 isoform X1 [P.reticulata]
19227847	19246279	g694		19364776	19383639	g700	5-hydroxytryptamine receptor 4-like [P.reticulata]
19228485	19231474	g695		19366089	19369078	g701	5-hydroxytryptamine receptor 4-like [P.reticulata]
19259553	19263882	g696		19396791	19401143	g702	sulfate anion transporter 1-like [P.reticulata]
19273118	19276699	g697		19411879	19415464	g703	progestin and adipoQ receptor family member 3-like [P.reticulata]
19280623	19293574	g698		19419248	19432044	g704	anthrax toxin receptor 2-like [P.reticulata]
19294786	19300580	g699		19433255	19439067	g705	ras-GEF domain-containing family member 1B-B-like [P.reticulata]
19330800	19348150	g700		19468059	19485469	g706	chondroitin sulfate proteoglycan 4-like isoform X1 [P.reticulata]
19353795	19360975	g701		19491102	19498269	g707	sorting nexin-18-like isoform X1 [P.reticulata]
19362809	19364162	g702		19499986	19501342	g708	SOSS complex subunit C isoform X1 [P.reticulata]
19365652	19375000	g703		19502826	19512245	g709	sorting nexin-30 [P.reticulata]
19380491	19386090	g704		19517761	19523383	g710	thymic stromal cotransporter homolog [P.reticulata]
19389998	19467866	g705		19527302	19604505	g711	A-kinase anchor protein 2-like isoform X1 [P.mexicana]
19505389	19534348	g706		19642949	19672272	g712	lipid phosphate phosphatase-related protein type 1 isoform X1 [P.mexicana]
19539648	19587132	g707		19677573	19725471	g713	glutamate receptor ionotropic, NMDA 3A [P.reticulata]
19727087	19792465	g708		19856010	19921375	g714	ephrin type-A receptor 5 [P.reticulata]
19748010	19748909	g709					ephrin type-A receptor 5 [P.reticulata]
19816498	19816959	g710		19945255	19945869	g715	heat shock protein 30-like [P.mexicana]
19818123	19818737	g711		19946880	19947494	g716	heat shock protein 30-like [P.mexicana]
19821276	19821890	g712		19950086	19950385	g717	heat shock protein 30-like isoform X1 [P.reticulata]
19823464	19823925	g713		19951929	19952543	g718	heat shock protein 30-like [P.mexicana]
19827312	19828652	g714		19955807	19957147	g719	N-acetyllactosaminide beta-1,3-N-acetylglucosaminyltransferase 2-like [P.reticulata]
19835453	19845338	g715		19963996	19973901	g720	mothers against decapentaplegic homolog 2 isoform X1 [P.mexicana]
19941275	19949433	g716		20021959	20093996	g721	SKI family transcriptional corepressor 2 [P.reticulata]
19941314	20126772	g717		20085890	20272094	g722	SKI family transcriptional corepressor 2 [P.reticulata]
19952413	19953591	g718		20096976	20098210	g723	immediate early response 3-interacting protein 1 [Xiphophorus maculatus]
19957303	19959599	g719		20101795	20104076	g724	haloacid dehalogenase-like hydrolase domain-containing protein 2 [P.formosa]
19959892	19966535	g720		20104366	20111027	g725	katanin p60 ATPase-containing subunit A-like 2 isoform X1 [P.reticulata]
19968825	19971454	g721		20113310	20115933	g726	sigma non-opioid intracellular receptor 1 [P.reticulata]
19972830	20001050	g722		20117308	20147176	g727	galactose-1-phosphate uridylyltransferase isoform X1 [P.reticulata]
20333952	20473796	g723		20481768	20623198	g728	ciliary neurotrophic factor receptor subunit alpha-like [P.reticulata]
20494480	20495307	g724		20643499	20644326	g729	transmembrane protein 267 [Xiphophorus maculatus]
20506414	20517196	g725		20655434	20666176	g730	ciliary neurotrophic factor receptor subunit alpha-like [P.reticulata]
20557905	20559621	g726		20703452	20705162	g731	cystatin-S-like [P.mexicana]
20566711	20573326	g727		20723530	20726517	g732	cystatin-like [P.latipinna]
20586826	20588993	g728		20731648	20733813	g733	cystatin-like [P.latipinna]
20600352	20602737	g730		20738973	20741356	g734	cystatin-like [P.latipinna]
20608008	20610604	g731		20746713	20749312	g735	cystatin-like [Xiphophorus hellerii]
20598098	20619798	g729		20754219	20758347	g736	ras association domain-containing protein 6-like [P.reticulata]
20625596	20647291	g732		20764134	20786168	g737	muscle, skeletal receptor tyrosine-protein kinase [P.mexicana]
20656223	20669737	g733		20795164	20808670	g738	lysophosphatidic acid receptor 1 [P.reticulata]
20710036	20721100	g734		20849072	20860270	g739	phospholipid-transporting ATPase ID-like [P.mexicana]
20726442	20730659	g735		20865709	20869926	g740	starch-binding domain-containing protein 1 [P.latipinna]
20732707	20733321	g736					heat shock protein 30-like [P.mexicana]
20773156	20786057	g737		20914657	20927501	g741	PHD finger protein 24 isoform X1 [P.mexicana]
20795768	20800983	g738		20936510	20941731	g742	5'-AMP-activated protein kinase subunit beta-1 [Xiphophorus maculatus]
20803976	20805337	g739		20944732	20946093	g743	phospholipase A2-like [P.reticulata]
20811078	20812088	g740		20951247	20952257	g744	protein phosphatase 1 regulatory subunit 3B-like [P.reticulata]
				21025258	21026932	g745	UN LOC103457971 [P.reticulata]
20955644	21055877	g741		21098539	21198823	g746	leucine-rich repeat transmembrane neuronal protein 4-like [P.reticulata]
21037960	21055883	g742		21134077	21198778	g747	leucine-rich repeat transmembrane neuronal protein 4-like [P.reticulata]
21054306	21055832	g743		21180904	21198820	g748	leucine-rich repeat transmembrane neuronal protein 4-like [P.reticulata]
				21197252	21198847	g749	leucine-rich repeat transmembrane neuronal protein 4-like [P.reticulata]
				21253012	21256958	g750	-
				21548553	21549088	g751	-
21343325	21345249	g744					UN LOC106941944 isoform X1 [P.latipinna]
21347035	21348162	g745					G2/M phase-specific E3 ubiquitin-protein ligase-like [Austrofundulus limnaeus]
21349138	21351819	g746					UN LOC106511599 [Austrofundulus limnaeus]
21412317	21412857	g747					-
21412879	21523460	g748		21549110	21659727	g752	retinoic acid receptor RXR-alpha isoform X1 [Xiphophorus maculatus]
21523766	21533766	g749		21660031	21670057	g753	WD repeat-containing protein 5 [P.reticulata]
21538819	21544157	g750		21676030	21681364	g754	bromodomain-containing protein 3-like [P.mexicana]
21551437	21744943	g751		21688636	21882164	g755	guanine nucleotide exchange factor VAV2 isoform X7 [P.mexicana]
21745779	21767679	g752		21882995	21904560	g756	coxsackievirus and adenovirus receptor-like isoform X1 [P.reticulata]
21781073	21861064	g753		21915088	21993080	g757	probable flavin-containing monoamine oxidase A [P.reticulata]
21869665	21921997	g754		22001757	22042212	g758	leucine-rich repeat transmembrane neuronal protein 4-like [P.reticulata]
21920357	21921907	g755		22040572	22042113	g759	leucine-rich repeat transmembrane neuronal protein 4-like [P.reticulata]
22099966	22144882	g756		22222602	22267378	g760	protein turtle homolog A-like [P.reticulata]
22164107	22167881	g757		22279704	22283490	g761	transmembrane protein 230-like [P.reticulata]
22196768	22203394	g758		22319204	22325826	g762	alpha-1A adrenergic receptor-like [P.reticulata]
22219475	22243633	g759		22341887	22366464	g763	dihydropyrimidinase-related protein 2 isoform X1 [P.mexicana]
22250584	22259855	g760		22373427	22382512	g764	BCL2/adenovirus E1B 19 kDa protein-interacting protein 3-like [P.latipinna]
22262754	22273811	g761		22385400	22396487	g765	serine/threonine-protein phosphatase 2A 55 kDa regulatory subunit B alpha isoform-like isoform X1 [P.latipinna]
22283163	22295693	g762		22405804	22418317	g766	gelsolin-like isoform X1 [P.formosa]
22297808	22305357	g763		22420431	22427947	g767	erythrocyte band 7 integral membrane protein-like [P.reticulata]
22308932	22315993	g764		22431175	22438229	g768	erythrocyte band 7 integral membrane protein-like isoform X1 [P.reticulata]
				22489360	22489793	g769	-
22374884	22380687	g765		22497056	22502865	g770	barH-like 1 homeobox protein [P.reticulata]
22422875	22430557	g766		22545410	22553097	g771	general transcription factor 3C polypeptide 4 isoform X2 [P.reticulata]
22451961	22455289	g767					UN LOC106941944 isoform X1 [P.latipinna]
22456032	22458227	g768					G2/M phase-specific E3 ubiquitin-protein ligase-like [Austrofundulus limnaeus]
22459258	22461862	g769					UN LOC106908860 isoform X1 [P.mexicana]
22521461	22536195	g770		22626599	22641996	g772	hamartin [P.reticulata]
22545438	22550670	g771		22650932	22656166	g773	zinc finger protein Gfi-1b [P.reticulata]
22564608	22570615	g772		22667385	22676165	g774	general transcription factor 3C polypeptide 5 [P.formosa]
22570960	22579123	g773		22676510	22684660	g775	bile salt-activated lipase-like [P.mexicana]
22581807	22587664	g774		22687307	22693134	g776	bile salt-activated lipase-like [Xiphophorus hellerii]
22591397	22605537	g775		22696877	22711137	g777	cholesterol 7-desaturase-like [P.mexicana]
22622650	22671924	g776		22728995	22778835	g778	glutamate receptor ionotropic, NMDA 1 isoform X3 [P.reticulata]
22676711	22688075	g777		22786848	22803900	g779	ectonucleoside triphosphate diphosphohydrolase 2 [P.mexicana]
22691076	22692351	g778		22806900	22808600	g780	14 kDa phosphohistidine phosphatase [P.latipinna]
22698064	22715326	g779		22814357	22833993	g781	apical endosomal glycoprotein-like [P.formosa]
22740427	22741391	g780					vegetative cell wall protein gp1-like [P.reticulata]
22750556	22755720	g781		22875657	22881008	g782	glutamine synthetase-like [P.mexicana]
22759282	22793924	g782		22884707	22918262	g783	arrestin domain-containing protein 1 [P.reticulata]
22782288	22782944	g783					-
22798765	22807363	g784		22923143	22931967	g784	probable low affinity copper uptake protein 2 isoform X2 [P.latipinna]
22812712	22839213	g785		22937368	22963749	g785	niban-like protein 1 [P.reticulata]
22841272	22862940	g786		22965856	22987903	g786	syntaxin-binding protein 1 isoform X1 [P.reticulata]
22872124	22889913	g787		22997115	23016034	g787	AT-hook-containing transcription factor isoform X1 [P.reticulata]
22901831	23029360	g788		23028992	23178914	g788	whirlin isoform X1 [P.reticulata]
22969357	22970014	g789		23114470	23115192	g789	UN LOC103460807 [P.reticulata]
22995582	23116595	g790		23140040	23258360	g790	UN LOC103461305 [P.reticulata]
23040491	23053217	g791		23190077	23202232	g791	endoplasmic reticulum mannosyl-oligosaccharide 1,2-alpha-mannosidase-like isoform X1 [P.reticulata]
23041640	23203690	g792					UN LOC114135683 [Xiphophorus couchianus]
23056187	23160585	g793		23204970	23267676	g792	collagen alpha-1(I) chain-like isoform X1 [P.reticulata]
23126909	23133946	g794					UN LOC115789669 [Archocentrus centrarchus]
23137495	23139466	g795					UN LOC115777862 [Archocentrus centrarchus]
23198508	23200423	g796					UN LOC111609469 [Xiphophorus maculatus]
23202499	23203534	g797					UN LOC116725240 [Xiphophorus hellerii]
23259710	23261341	g798		23297610	23299240	g793	UN LOC116708056 [Xiphophorus hellerii]
23271211	23354420	g799		23307436	23429683	g794	voltage-dependent N-type calcium channel subunit alpha-1B-like isoform X1 [Xiphophorus maculatus]
23451398	23452419	g800		23398939	23400661	g795	arginine esterase-like [P.reticulata]
23471751	23482475	g801		23432432	23463689	g796	histone-lysine N-methyltransferase EHMT1 isoform X1 [P.reticulata]
23605486	23619919	g802		23465177	23469589	g797	Sjoegren syndrome nuclear autoantigen 1 [P.reticulata]
23621774	23625517	g803		23477228	23497978	g798	taperin isoform X2 [P.reticulata]
23668162	23669325	g804		23502166	23502582	g799	transmembrane protein 203 [Xiphophorus maculatus]
				23505676	23510031	g800	delta-aminolevulinic acid dehydratase [Xiphophorus couchianus]
23721076	23791072	g805		23513257	23575598	g801	atrial natriuretic peptide receptor 2-like [P.latipinna]
23793174	23796136	g806		23577725	23580685	g802	sperm-associated antigen 8-like [P.reticulata]
23802034	23802423	g807		23585634	23586023	g803	pro-MCH-like [P.reticulata]
23819973	23823406	g808		23603008	23606444	g804	G2/mitotic-specific cyclin-B1 [P.reticulata]
				23604161	23604734	g805	G2/mitotic-specific cyclin-B1 [P.reticulata]
23827282	23829467	g809		23610278	23612462	g806	AN1-type zinc finger protein 5-like [P.reticulata]
23831459	23843277	g810		23614456	23626592	g807	LOW QUALITY PROTEIN: transmembrane channel-like protein 2-A [Xiphophorus maculatus]
				23676182	23676907	g808	stonustoxin subunit beta-like, partial [P.latipinna]
				23704133	23711705	g809	general transcription factor II-I repeat domain-containing protein 2-like [Hippocampus comes]
23919976	23928411	g811		23720445	23728864	g810	annexin A1-like [P.mexicana]
23932325	23933638	g812		23732090	23733403	g811	UN LOC116708056 [Xiphophorus hellerii]
23934935	23943872	g813		23734700	23743478	g812	zinc transporter 5 [P.mexicana]
23944272	23957869	g814		23743878	23758133	g813	MAM domain-containing protein 2 isoform X1 [P.reticulata]
23968864	23978750	g815		23769070	23779072	g814	amyloid beta A4 precursor protein-binding family A member 1-like [P.reticulata]
23982874	24015208	g816		23783177	23815433	g815	tight junction protein ZO-2 isoform X3 [P.mexicana]
24022701	24023456	g817		23822931	23823690	g816	-
24028011	24038312	g818		23828256	23838546	g817	phosphatidylinositol 4-phosphate 5-kinase type-1 beta-like isoform X1 [P.latipinna]
24067036	24068724	g819					paraneoplastic antigen Ma3 homolog [Oryzias latipes]
24099498	24099904	g820					-
24210523	24224421	g821					tripartite motif-containing protein 35-like [Xiphophorus maculatus]
				23856333	23954614	g818	UN LOC103461047 [P.reticulata]
				23915908	23916185	g819	-
24312776	24409334	g822		24087387	24169067	g820	ephrin-A5b-like isoform X1 [P.mexicana]
24455965	24461676	g823		24217715	24223297	g821	GPI ethanolamine phosphate transferase 3 [P.reticulata]
24463532	24467215	g824		24225151	24228753	g822	stomatin-like protein 2, mitochondrial isoform X1 [P.reticulata]
24468966	24537352	g825		24230514	24298561	g823	protein unc-13 homolog B isoform X1 [P.reticulata]
24558671	24560036	g826		24303389	24304857	g824	UN LOC116684917 [Etheostoma spectabile]
24560083	24562611	g827		24336492	24337793	g825	UN LOC103474038 [P.reticulata]
24577235	24582222	g828		24336492	24352796	g826	UN LOC103474038 [P.reticulata]
24607127	24616471	g829		24337156	24340488	g827	UN LOC106530320, partial [Austrofundulus limnaeus]
24617782	24623821	g830		24339970	24341241	g828	UN LOC117472152 [Trematomus bernacchii]
24635965	24641917	g831		24376288	24385246	g829	actin, cytoplasmic-like [P.reticulata]
24637374	24658948	g832		24384414	24419504	g830	actin, cytoplasmic-like [P.reticulata]
24694063	24695553	g833		24401234	24403338	g831	actin, cytoplasmic-like [P.reticulata]
24700102	24701846	g834		24435494	24437598	g832	actin, cytoplasmic-like [P.reticulata]
				24482355	24483452	g833	UN LOC106533973 [Austrofundulus limnaeus]
				24482463	24483260	g834	UN LOC106533973 [Austrofundulus limnaeus]
24806989	24821326	g835		24629546	24643954	g835	phospholipid-transporting ATPase ID-like [P.reticulata]
24828972	24829886	g836		24651601	24652515	g836	growth arrest and DNA damage-inducible protein GADD45 gamma-like [P.formosa]
24833872	24834948	g837		24656498	24657585	g837	LOW QUALITY PROTEIN: growth arrest and DNA damage-inducible protein GADD45 gamma-like [Xiphophorus hellerii]
24838043	24840949	g838		24660681	24665439	g838	serine/threonine-protein kinase NIM1-like [P.reticulata]
24843136	24850647	g839		24667634	24675332	g839	coiled-coil domain-containing protein 152 isoform X1 [P.latipinna]
24853762	24868867	g840		24678415	24693759	g840	prolactin receptor-like [P.reticulata]
24870271	24879863	g841		24695163	24704740	g841	complement component C7-like [Xiphophorus maculatus]
24881005	24898780	g842		24705882	24722739	g842	complement component C6-like [P.formosa]
24899880	24903776	g843		24723838	24727739	g843	E3 ubiquitin-protein ligase RNF180-like isoform X1 [P.reticulata], P.ret
				24724721	24726940	g844	E3 ubiquitin-protein ligase RNF180-like isoform X1 [P.reticulata], D.rerio
				24733012	24733392	g845	UN LOC116721251 [Xiphophorus hellerii]
24907707	24908963	g844		24736779	24738035	g846	5-hydroxytryptamine receptor 1A-beta-like [P.mexicana]
24917926	24918743	g845		24746921	24747744	g847	UN LOC103474032 [P.reticulata]
				24765847	24766798	g848	-
24940636	24943646	g846		24771398	24774385	g849	prostate androgen-regulated mucin-like protein 1 [P.mexicana] PARM
24955814	24957506	g847		24786669	24788335	g850	proline-, glutamic acid- and leucine-rich protein 1-like [P.reticulata]
24965518	24968760	g848		24796335	24799583	g851	clumping factor A-like [P.reticulata]
24987715	24989701	g849					-
24992050	24992599	g850					-
25012325	25030311	g851		24841327	24859161	g852	SH3 domain-binding protein 2 isoform X1 [P.formosa]
25033841	25050003	g852		24862708	24878825	g853	very low-density lipoprotein receptor isoform X1 [Xiphophorus maculatus]
				24913218	24918801	g854	UN LOC116731410 isoform X1 [Xiphophorus hellerii]
				24913310	24914622	g855	UN LOC109143113 isoform X1 [Larimichthys crocea]
25080514	25081605	g853					UN LOC107834776 [P.formosa]
				25004123	25078840	g856	UN LOC113024243 isoform X1 [Astatotilapia calliptera]
25295936	25301347	g854		25120846	25128432	g857	potassium voltage-gated channel subfamily V member 2 [P.formosa]
25302788	25309835	g855		25129884	25140212	g858	pumilio domain-containing protein KIAA0020 homolog isoform X2 [Poecilia latipinna]
25311394	25334880	g856		25141772	25165256	g859	cilia- and flagella-associated protein 44 [Poecilia reticulata]
				25358503	25370078	g860	stonustoxin subunit alpha-like [Poecilia reticulata]
25459589	25464952	g857					UN LOC103470805 [Poecilia reticulata]
25541184	25541423	g858					UN LOC113648197 [Tachysurus fulvidraco]
				25406481	25461275	g861	UN LOC111606787 isoform X2 [Xiphophorus maculatus]
25562842	25564515	g859		25416228	25416593	g862	NACHT, LRR and PYD domains-containing protein 5-like [Xiphophorus hellerii]
				25428846	25429575	g863	-
				25436160	25436477	g864	UN LOC115554493 [Gadus morhua]
				25459789	25461150	g865	UN LOC106913396 [Poecilia mexicana]
25566743	25567525	g860		25474786	25475568	g866	lys-63-specific deubiquitinase BRCC36 [Xiphophorus maculatus] brcc3
25579663	25584615	g861		25486235	25491733	g867	teratocarcinoma-derived growth factor 1-like [Poecilia latipinna]
25588690	25593558	g862		25495774	25500531	g868	trichohyalin-like [Poecilia reticulata]
25598062	25604793	g863		25505101	25511845	g869	UN LOC103473913 isoform X1 [Poecilia reticulata]
25606623	25611100	g864		25513716	25518149	g870	dnaJ homolog subfamily C member 25 [Poecilia latipinna]
25616508	25652621	g865					-
25653363	25663577	g866		25549594	25568427	g871	ferrochelatase, mitochondrial [Xiphophorus maculatus]
25681097	25711977	g867		25587166	25618090	g872	one cut domain family member 2 [Poecilia formosa]
25712038	25715402	g868					-
25719695	25728215	g869		25625558	25634395	g873	sia-alpha-2,3-Gal-beta-1,4-GlcNAc-R:alpha 2,8-sialyltransferase-like isoform X1 [Poecilia reticulata]
25769448	25832972	g870					WD repeat-containing protein 7 isoform X2 [Poecilia latipinna]
25834703	25843656	g871					TATA box-binding protein-associated factor RNA polymerase I subunit C [Poecilia reticulata]
				25670415	25672141	g874	-
25846079	25851167	g872		25765118	25767839	g875	cyclin-G2-like [Poecilia reticulata]
25856670	25863321	g873		25773319	25780388	g876	cyclin-I isoform X1 [Poecilia reticulata]
25869118	25875762	g874		25785832	25792084	g877	titin-like isoform X1 [Poecilia reticulata], Prot. P.form, overlapping g878
				25788815	25792084	g878	titin-like isoform X1 [Poecilia reticulata], Prot P.mex
25877646	25922820	g875		25794090	25842888	g879	protein Shroom3-like [Poecilia reticulata], overlapping g880
25925621	25931093	g876		25845694	25850954	g881	UN LOC106925545 isoform X2 [Poecilia mexicana]
25934223	25948165	g877		25854032	25865648	g882	hippocampus abundant transcript 1 protein-like isoform X1 [Poecilia mexicana]
25950129	25972438	g878		25868618	25913275	g883	acyl-CoA-binding domain-containing protein 6-like [Xiphophorus couchianus]
				25875402	25876219	g884	zinc finger MYM-type protein 1-like isoform X1 [Xiphophorus hellerii]
				25907391	25908212	g885	UN LOC106951161 [Poecilia latipinna]
25979809	25982063	g879		25987747	25993537	g886	spindlin-1-like [Xiphophorus maculatus]
25988157	25995568	g880		26001291	26008074	g887	asparagine--tRNA ligase, cytoplasmic isoform X1 [Poecilia reticulata]
25996760	25999113	g881		26010656	26009304	g000	TRIM16 P.form 86%ID
25999787	26004403	g882		26012386	26016500	g888	thioredoxin-like protein 1 [Poecilia reticulata]
26027029	26032550	g883		26040459	26044532	g889	ras-related protein Rab-27B isoform X1 [Denticeps clupeoides]
26151141	26213017	g993					UN LOC103457181 [P.reticulata]
26158768	26159073	g994					UN LOC103482417 [P.reticulata]
26320995	26323595	g991		26196446	26250628	g1029	-
26242067	26256338	g992		26258415	26301432	g1028	phospholipid-transporting ATPase IC [P. mexicana]
26308202	26494464	g990		26309932	26490266	g1027	netrin receptor DCC [P. mexicana]
26532015	26533051	g989					lysozyme C-like [P.reticulata]
26535232	26536954	g988		26540515	26542237	g1026	lysozyme C-like [P. reticulata]
26539925	26549688	g987		26549236	26555018	g1025	methyl-CpG-binding domain protein 2-like [P. reticulata]
26562037	26568104	g986		26567265	26574277	g1024	UN protein LOC103460253 [P. reticulata]
26568289	26572876	g985		26574475	26579107	g1023	flagellar WD repeat-containing protein Pf20-like [P. reticulata]
26577224	26588688	g984		26583409	26592990	g1022	WD repeat-containing protein 91 [P. reticulata]
26590157	26590537	g983		26594539	26594919	g1021	perforin-1-like [P. mexicana]
26600479	26602452	g982		26605026	26606846	g1020	lysozyme C-like [P. reticulata]
26607514	26607894	g981		26609985	26610365	g1019	perforin-1-like [P. mexicana]
26612095	26624827	g980		26614715	26625581	g1018	VID27-like protein [P. reticulata]
				26625987	26626705	g1017	-
26648536	26649495	g979		26646008	26646976	g1016	transcription factor jun-D-like [P. reticulata]
26657030	26667307	g978		26654602	26663943	g1015	leukemia inhibitory factor receptor-like isoform X1 [P. reticulata]
				26648978	26726197	g1012	UN protein LOC103460265 [P. reticulata]
26677615	26681981	g977		26671989	26676408	g1014	UN protein LOC103465985 [P. reticulata]
26683181	26684160	g976					-
				26714338	26726197	g1011	UN protein LOC114571247 [Perca flavescens]
				26714350	26721877	g1013	UN protein LOC103460264 [P. reticulata]
				26714365	26726197	g1010	UN protein LOC103460265 [P. reticulata]
				26714368	26823805	g1002	UN protein LOC115776291 [Archocentrus centrarchus]
				26714383	26726197	g1009	UN protein LOC103460265 [P. reticulata]
				26714887	26726197	g1008	UN protein LOC103460265 [P. reticulata]
				26720345	26823805	g1001	UN protein LOC115776291 [Archocentrus centrarchus]
				26724671	26823805	g1000	UN protein LOC103460267 [P. reticulata]
				26724671	26820560	g1003	UN protein LOC103460267 [P. reticulata]
				26740969	26762347	g1007	UN protein LOC103460267 [P. reticulata]
				26760755	26762460	g1006	UN protein LOC103460267 [P. reticulata]
				26787532	26788504	g1005	O-acetyl-ADP-ribose deacetylase 1-like [P. reticulata]
				26803928	26820560	g1004	septin-1-like [P. reticulata]
26726781	26736397	g974		26911250	26923515	g998	carnitine O-acetyltransferase isoform X1 [P. mexicana]
26728090	26729156	g975		26912566	26913632	g999	LOW QUALITY PROTEIN: carnitine O-acetyltransferase-like [P. reticulata]
26738769	26755414	g973		26926066	26942438	g997	serine/threonine-protein phosphatase 2A activator [P. reticulata]
26768148	26769032	g972		26955506	26956309	g996	immediate early response gene 5-like protein [P. reticulata]
				26961088	26962305	g995	-
26790343	26792520	g971		26978864	26981035	g994	UN protein LOC103467109 [P. reticulata]
26803587	26804707	g970		26990193	26991313	g993	N-terminal Xaa-Pro-Lys N-methyltransferase 1 [P. reticulata]
26804896	26810649	g969		26991502	26998062	g992	NADPH-dependent diflavin oxidoreductase 1 [P. reticulata]
26811977	26823321	g968		26999380	27010914	g991	E3 ubiquitin-protein ligase LRSAM1 [P. formosa]
26829908	26832958	g967		27019362	27022501	g990	LIM domain transcription factor LMO4-B-like [P. latipinna]
26848429	26852909	g966		27042152	27046332	g989	cyclin-dependent kinase 9 isoform X1 [P. reticulata]
26853782	26861464	g965		27047205	27054896	g988	folylpolyglutamate synthase, mitochondrial isoform X1 [P. reticulata]
26863701	26865459	g964		27057133	27058891	g986	nuclear apoptosis-inducing factor 1 [P. mexicana]
26863701	26865459	g963		27057133	27058891	g987	nuclear apoptosis-inducing factor 1 [P. mexicana]
26863923	26865459	g962		27057355	27058891	g985	nuclear apoptosis-inducing factor 1 [P. mexicana]
26866875	26880678	g961		27060086	27074352	g984	protein FAM102A-like [P. reticulata]
26884387	26885660	g960		27077388	27079255	g983	dolichol phosphate-mannose biosynthesis regulatory protein isoform X1 [P.reticulata]
26888647	26896940	g959		27082921	27092496	g982	phosphatidylinositol 4-phosphate 5-kinase-like protein 1 [P. mexicana]
26908880	26925950	g958		27104892	27120879	g981	endophilin-B2-like [P. mexicana]
26930969	26939078	g957		27125784	27134962	g980	protein zer-1 homolog [P. latipinna]
26945397	26952527	g956		27141121	27148199	g979	TBC1 domain family member 13 [P. reticulata]
26959032	26964231	g954		27153969	27167954	g974	UN protein LOC102229642 [X. maculatus]
26958357	26964222	g955		27154029	27159892	g978	UN protein LOC103132561 isoform X1 [P. formosa]
26958354	26964237	g953		27154026	27159907	g976	UN protein LOC114149866 isoform X1 [X. couchianus]
26958366	26964240	g952		27154038	27159910	g975	UN protein LOC114149866 isoform X1 [X. couchianus]
26958297	26964246	g951		27154145	27549324	g939	UN protein LOC114571247 [Perca flavescens]
				27154704	27159901	g977	UN protein LOC102229642 [X. maculatus]
				27158342	27549393	g933	UN protein LOC115776291 [Archocentrus centrarchus]
26973095	26985525	g950		27168765	27181257	g973	threonine synthase-like 2 [P. latipinna]
26986384	26997399	g949		27182116	27191825	g972	ATP-dependent RNA helicase DQX1 [P. reticulata]
26997791	27003960	g948		27192217	27198448	g971	histone-lysine N-methyltransferase SMYD1 [P.reticulata]
27005425	27007897	g947		27199913	27202448	g970	sepiapterin reductase [P. reticulata]
27011424	27019513	g946		27209852	27218070	g969	excitatory amino acid transporter 1 isoform X1 [P. mexicana]
27023211	27031736	g945		27221811	27231454	g968	NAD kinase 2, mitochondrial isoform X1 [P.reticulata]
27034277	27037912	g944		27233803	27237441	g967	WD repeat-containing protein 34 [P. reticulata]
27038120	27060502	g943		27237649	27259510	g966	spectrin alpha chain, non-erythrocytic 1 isoform X2 [P. reticulata]
27061485	27081388	g942		27260493	27281378	g965	outer dense fiber protein 2 [P. latipinna]
27086164	27097629	g941		27288170	27297293	g964	protein SCAI isoform X4 [X. maculatus]
27102919	27107166	g940		27302657	27308468	g963	serine/threonine-protein phosphatase 6 catalytic subunit-like [X. hellerii]
27108995	27118514	g938		27310361	27320062	g962	stromelysin-3-like [P. reticulata]
27122708	27126873	g937		27325146	27329501	g961	S-phase kinase-associated protein 2 [P. reticulata]
27128884	27132936	g936		27331680	27335700	g960	protein SET-like [P.reticulata]
27134260	27143432	g935		27337517	27345958	g959	serine/threonine-protein kinase N2-like isoform X1 [P. reticulata]
27144738	27147204	g934		27347576	27350333	g958	probable palmitoyltransferase ZDHHC12 [P. reticulata]
27148036	27151531	g933		27351163	27354699	g957	UDP-N-acetylhexosamine pyrophosphorylase-like protein 1 [P. reticulata]
				27355889	27365058	g956	calcium-binding mitochondrial carrier protein SCaMC-2-B-like isoform X1 [P. reticulata]
27152834	27161045	g932		27366308	27366784	g955	calcium-binding mitochondrial carrier protein SCaMC-2-B-like isoform X2 [P. reticulata]
27163604	27170673	g931		27369094	27374960	g954	SWI/SNF-related matrix-associated actin-dependent regulator of chromatin subfamily B member 1-like [P. reticulata]
27173342	27185092	g930		27379310	27387437	g953	derlin-2 [P. latipinna]
				27393875	27398831	g952	UN protein LOC106905350 isoform X1 [P. mexicana]
27266182	27271788	g929		27400836	27406900	g951	NACHT, LRR and PYD domains-containing protein 12-like isoform X1 [P. reticulata]
27276256	27283081	g928		27411369	27417781	g950	protein phosphatase 1 regulatory subunit 3B [P. reticulata]
27302394	27309962	g927		27453812	27462891	g949	LMBR1 domain-containing protein 2 [X. maculatus]
				27471192	27474302	g948	UN protein LOC129355021 [Poeciliopsis prolifica ]
27314568	27315796	g926					UN LOC117269520 [Epinephelus lanceolatus]
27317224	27319337	g925		27475729	27477847	g947	UN protein LOC106908402 [P. mexicana]
27324344	27328441	g924		27481419	27482943	g946	UN protein LOC103474048 [P. reticulata]
27329422	27332468	g923		27484292	27487357	g945	cilia- and flagella-associated protein 53 [P. reticulata]
27342440	27366146	g922		27496158	27518665	g944	unconventional myosin-Vb isoform X4 [X. couchianus]
				27523945	27524264	g943	-
27375171	27380365	g921		27527038	27532307	g942	interleukin-7 receptor subunit alpha-like isoform X1 [P. reticulata]
27385325	27390245	g920		27534416	27539429	g941	calcyphosin-like protein [P. reticulata]
26958473	27402183	g919		27547810	27553219	g932	UN protein LOC103474067 [P. reticulata]
				27557552	27558772	g930	-
27228378	27402702	g918		27393875	27600356	g929	UN protein LOC103474067 [P. reticulata]
27325730	27402717	g917		27393875	27549387	g934	UN protein LOC103474067 [P. reticulata]
				27393875	27549372	g935	NACHT, LRR and PYD domains-containing protein 12-like isoform X1 [P. reticulata]
				27393875	27549372	g936	UN protein LOC106905350 isoform X1 [P. mexicana]
				27393875	27549336	g937	UN protein LOC106905350 isoform X1 [P. mexicana]
				27393875	27549291	g940	UN protein LOC103474067 [P. reticulata]
27459858	27472034	g916					stonustoxin subunit beta-like [P.latipinna]
27501215	27501825	g915					programmed cell death 1 ligand 1-like [P.formosa]
27501296	27501948	g914					CD276 antigen-like [X. hellerii]
27964123	27964729	g913					UN LOC106931877 isoform X1 [P.mexicana]
				27485122	27558772	g931	microtubule-associated protein 1A-like P.formosa
				27628046	27737659	g928	NACHT, LRR and PYD domains-containing protein 14-like [X. hellerii]
				27835885	27837143	g927	UN protein LOC106920688 isoform X2 [P. mexicana]
				27843841	27849146	g925	UN protein LOC103132782, partial [P. formosa]
				27844679	27845968	g926	UN protein LOC103132782, partial [P. formosa]
				27949842	27950552	g924	UN protein LOC110368094 [Fundulus heteroclitus]
				28011771	28028225	g923	UN protein LOC108166504 [P. reticulata]
				28072804	28074034	g922	UN protein LOC116724404 isoform X1 [X. hellerii]
				28072943	28075227	g921	UN protein LOC111609528 isoform X1 [X. maculatus]
				27947894	28077128	g920	ras-related protein Rab-27B-like isoform X1 [P. reticulata]
28027796	28034762	g912		28144230	28150092	g919	UN protein LOC106908265 [P. mexicana]
27866217	28048718	g911					UN LOC106914092 [P.mexicana]
28040008	28049255	g910		28153792	28160981	g918	UN protein LOC103460448 isoform X1 [P. reticulata]
28055944	28066208	g909		28166828	28173412	g917	UN LOC103460457 [P.reticulata]
28069253	28075419	g908		28176114	28182692	g916	hydroxysteroid dehydrogenase-like protein 2 isoform X1 [P. reticulata]
28079581	28092504	g907		28186862	28195107	g915	polypyrimidine tract-binding protein 3 isoform X1 [P.reticulata]
28094125	28100738	g906		28196811	28203644	g914	ceramide glucosyltransferase [P. reticulata]
28103796	28104567	g905		28205427	28206197	g913	molybdopterin synthase catalytic subunit-like [P. reticulata]
28104605	28105803	g904		28206235	28207518	g912	molybdopterin synthase sulfur carrier subunit-like [P. reticulata]
28107487	28122369	g903		28208787	28219132	g911	protein asteroid homolog 1-like [X. couchianus]
28123628	28142526	g902		28220391	28235321	g910	alpha-mannosidase 2 isoform X1 [X. hellerii]
28174098	28184094	g901		28239168	28249056	g909	WD repeat-containing protein 36 [P. reticulata]
28187131	28189763	g900		28252109	28254691	g908	solute carrier family 25 member 46 [X. couchianus]
28191402	28196194	g899		28256327	28259825	g907	high affinity copper uptake protein 1 [P. reticulata]
28201676	28203574	g898		28267204	28269341	g905	V-type proton ATPase subunit G 1-like [P. mexicana]
				28267433	28268494	g906	-
28207626	28211748	g897		28272803	28277050	g904	FSD1-like protein isoform X1 [P.reticulata]
28212988	28229128	g896		28278286	28295461	g903	adenomatous polyposis coli protein [P. reticulata]
28235671	28238971	g895		28307464	28310654	g902	fukutin isoform X1 [P.reticulata]
28239531	28240043	g894		28311216	28311728	g901	ubiquitin-fold modifier-conjugating enzyme 1 [X. maculatus]
28241224	28249337	g893		28312907	28321450	g900	YTH domain-containing protein 1 [P. reticulata]
28252166	28269753	g892		28324302	28347136	g898	putative ferric-chelate reductase 1 [P. reticulata]
				28334027	28334272	g899	ras-like GTP-binding protein O-RHO [P. reticulata]
28271623	28280992	g891		28349112	28361608	g897	U4/U6 small nuclear ribonucleoprotein Prp4, partial [P. mexicana]
28289951	28290305	g890		28370686	28371040	g896	anaphase-promoting complex subunit CDC26 [P. reticulata]
28297258	28311205	g889		28376062	28386299	g895	tyrosine-protein kinase Fer-like isoform X1 [P. mexicana]
28318273	28318512	g888		28393020	28393259	g894	UN protein si:ch211-202f5.3 [Danio rerio]
28326617	28327400	g887		28397278	28398058	g893	RING finger protein 224-like [P. reticulata]
28328085	28337294	g886		28398762	28407478	g892	phosphatidylserine decarboxylase proenzyme, mitochondrial isoform X1 [P. reticulata]
28345004	28354753	g885		28414596	28422060	g891	UN protein LOC103460428 isoform X1 [P. reticulata]
28361054	28363899	g884		28428206	28431051	g890	UDP-glucuronosyltransferase 2C1 [P. reticulata]
						-	no significant homology found
84 genes not found on Ymac				60 genes not found on Ygua
