# Supplementary material for: Identification of the male-specific region on the guppy Y Chromosome from a haplotype-resolved assembly
Source: Genome Res. 2025 Mar;35(3):489–98. doi: 10.1101/gr.279582.124 (PMC11960691; doi:10.1101/gr.279582.124)
Supplement: Supplement 6 [file Supplemental_Table_S6.xlsx]

## Sheet: Gua_only
Table S6: Y-chromosomal genes annoted as incomplete on female LG12
Ymac_ID	Ygua_ID	Gene_start	Gene_end	GUA GENE NAME	Comments on function and expression	Female genome	Start	End	P.reticulata Protein	By screning of female raw reads	By retrieving from female pool-seq reads
g773	g775	22676510	22684660	bile salt-activated lipase-like [P.mexicana]	male	NC_024342.1			2 cds of 12 only	exon 1 and 12 are missing	exon 1 (29 bp) is missing
g774	g776	22687307	22693134	bile salt-activated lipase-like [X.hellerii]	fem and male	NC_024342.1	22553407	22560172	XP_017163223.1	all exons found	all exons found
g836	g836	24651601	24652515	growth arrest and DNA damage-inducible protein GADD45 gamma-like [P.formosa]	gadd45gl has 2 copies on X.mac Chr 8, ~3MB, one sense, one reverse				no complete reverse g836	all exons found	all exons found
g837	g837	24656498	24657585	LOW QUALITY PROTEIN: growth arrest and DNA damage-inducible protein; GADD45 gamma-like [X.hellerii]	Only one complete on female; potential palindrome? Growth arrest at puberty male-specific trait	NC_024342.1	24968739	24976592	XP_008422957.2	all exons found	all exons found
g855	g858	25129884	25140212	pumilio domain-containing protein KIAA0020 homolog isoform X2 [P.latipinna] 17 cds	RNA binding protein; stem cell maintenance. Pum3-like XP_017163214.1 on female LG12: cds 2,3,4 and 11, 12, 13 not found. Functional domains would be impaired.	NC_024342.1	20931737	20940353	pum 3 -like XP_017163214.1	exon 5-7; 14-16 are missing	all exons found
g864	g870	25513716	25518149	dnaJ homolog subfamily C member 25 [P.latipinna]	heat shock; 1st exon not found on female	NC_024342.1	21097343	21100403	XP_017163215.1 partial	exon 1 is missing	all exons found
g873	g876	25773319	25780388	cyclin-I isoform X1 [Poecilia reticulata]	male-specific SNPs in several populations	NC_024342.1	21357189	21366642	XP_008422792.1	all exons found	all exons found
g875	g879	25794090	25842888	protein Shroom3-like [Poecilia reticulata]	male-specific SNPs in several populations	NC_024342.1	21380130	21424112	XP_017163217.1	all exons found	all exons found
g879	g886	25987747	25993537	spindlin-1-like [X.maculatus]	Ssty domain; spermiogenesis; cds1,2,3,4 not found on female LG12	NC_024342.1	21478140	21478352	partial	exon 1 is missing	all exons found
None of the missing exons was found on reassembled Xgua or Xmac.
