# Supplementary material for: Identification of the male-specific region on the guppy Y Chromosome from a haplotype-resolved assembly
Source: Genome Res. 2025 Mar;35(3):489–98. doi: 10.1101/gr.279582.124 (PMC11960691; doi:10.1101/gr.279582.124)
Supplement: Supplement 7 [file Supplemental_Table_S7.xlsx]

## Sheet: Table S5
Table S7: Genomic PCR test for presence of genes on female genome
Gene on Ygua	Primer seq (5' 3')	Expected Product (bp)	Result male	female
gadd45g g836 fw E1	AAAACCGGCTCACTGTTGGC	320	ca 320	same
gadd45g g836 rev E2	CGTCTTCCTGCTCGTCTCCG
zer1 g980 fw E9	GAACTGCTGCCTGACGCTC	305	ca 300	same
zer1 g980 rev E10	CTGGATCAGGTTCAGCATGG
spin1 g886 fw	AAGCATAAGAGCAGCCTCGG	560	ca 560	same
spin1 g886 rev	AGTCGAACCCGTCGTACTTG
bsa lipase g775 fw	GTACACTTAAGGCCACCCAG	1560	ca 1600	same
bsa lipase g775 rev	TCAAAGAGACGCTTCCTGCG
bsa lipase g775 fw	CTGGACCCTTACATGACCAC	550	550 + ca 300
bsa lipase g775 rev	TGGAAGCTAACACCGGCTC		both weak	same
